# Supplementary material
Source: PubMed Central journal article supplement (PMC3582810)
Supplement: NIHMS410518-supplement-01.pdf [file NIHMS410518-supplement-01.pdf]

## Supplementary Information

### Genome-wide profiling of multiple histone methylations in olfactory cells: further implications for cellular susceptibility to oxidative stress in schizophrenia

Shin-ichi Kano<sup>1</sup>, Carlo Colantuoni<sup>1, 2, \*</sup>, Fang Han<sup>2</sup>, Zhifeng Zhou<sup>3</sup>, Qiaoping Yuan<sup>3</sup>, Ashley Wilson<sup>1</sup>, Yoichiro Takayanagi<sup>4</sup>, Yohan Lee<sup>5</sup>, Judith Rapoport<sup>5</sup>, William Eaton<sup>4</sup>, Nicola Cascella<sup>1</sup>, Hongkai Ji<sup>2</sup>, David Goldman<sup>3</sup>, and Akira Sawa<sup>1</sup>

<sup>1</sup>Department of Psychiatry and Behavioral Sciences, Johns Hopkins University School of Medicine, Baltimore, MD 21287, USA

<sup>2</sup>Department of Biostatistics, Johns Hopkins University School of Public Health, Baltimore, MD 21205, USA

<sup>3</sup>Laboratory of Neurogenetics, National Institute on Alcohol Abuse and Alcoholism, Bethesda, MD 20892, USA

<sup>4</sup>Department of Mental Health, Johns Hopkins University School of Public Health, Baltimore, MD 21205, USA

<sup>5</sup>Child Psychiatry Branch, National Institute of Mental Health, Bethesda, MD 20892, USA

\*Present address: Lieber Institute for Brain Development

#### Supplementary information content

Acknowledgements, Supplementary Figures 1-3, Supplementary Figure legends, Supplementary Tables 1-7, Supplementary Methods and Materials, and Additional References.

## **Acknowledgements**

We thank Dr. Pamela Talalay, and Yukiko Lema for their critical readings and manuscript organization. This work was supported by grants from the US National Institutes of Health (MH-084018, MH-94268 Silvio O. Conte center, MH-069853, MH-085226, MH-088753, and MH-092443 to A.S.), as well as grants from Stanley (A.S.), S-R (A.S.), RUSK (A.S.), NARSAD (A.S.), JHU-BSI (A.S.), and MSCRF (A.S.). S. K. was supported by Uehara foundation, Kanae foundation, and JSPS, and is currently supported by NIH Pathway to Independence Award (K99MH093458) and NARSAD Young Investigator award (the Hammerschlag Family Investigator).

# Supplementary Figure 1

a.

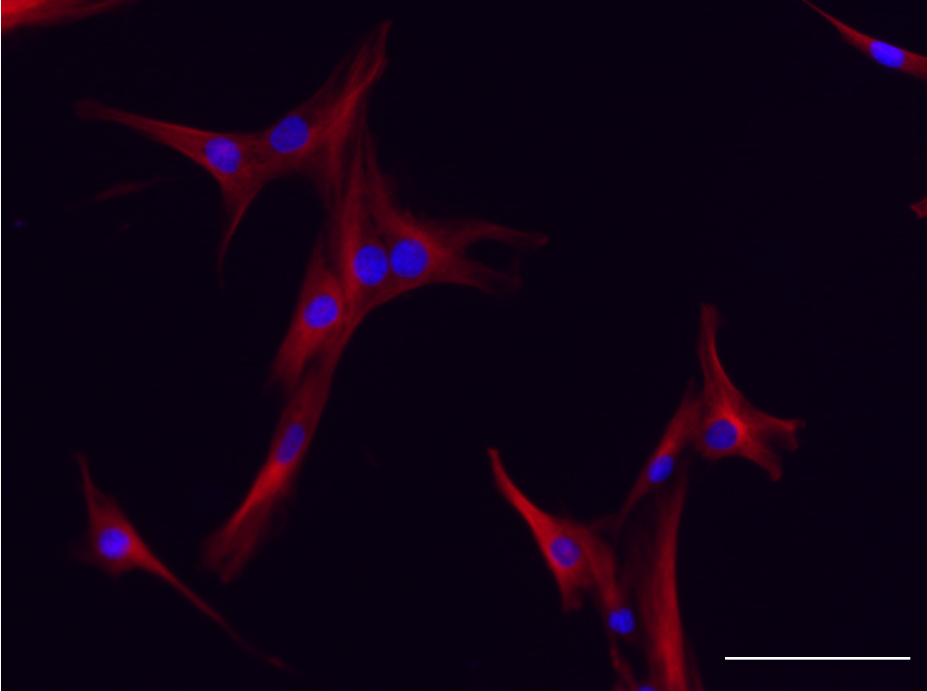

$\beta$ III-tubulin  
DAPI

b.

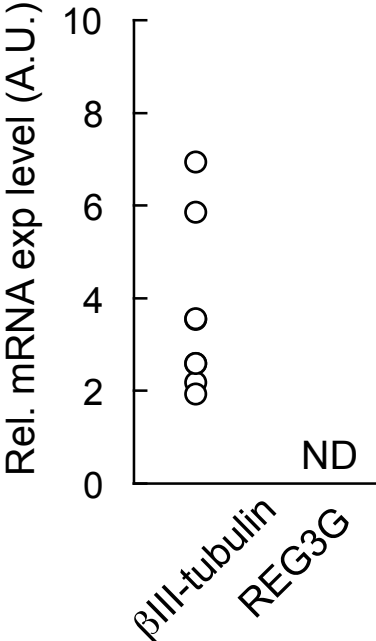

# Supplementary Figure 2

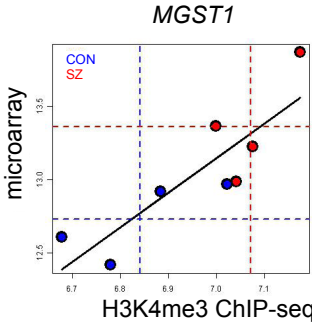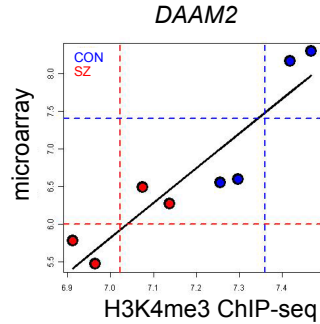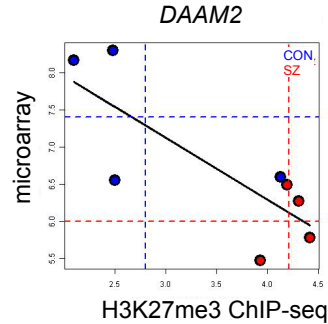

# Supplementary Figure 3

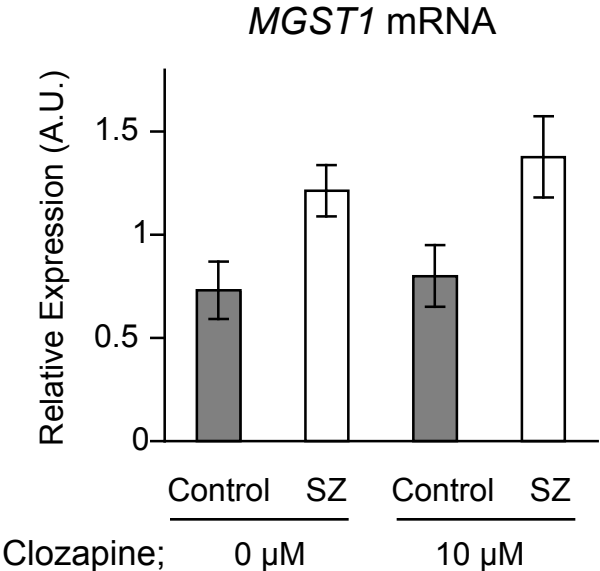

## Supplementary Figure legends

**Supplementary Figure 1: Characterization of olfactory cells.** (a) Representative picture of olfactory cells. Nearly all the olfactory cells are homogeneously stained with  $\beta$ III-tubulin (in red), a marker for immature neurons. Blue, DAPI staining for the nucleus, Scale bar: 100  $\mu$ m. (b) No expression of regenerating islet-derived 3-gamma (*REG3G*) gene, a respiratory epithelium marker, in olfactory cells. Quantitative RT-PCR was performed to examine the expression level of  $\beta$ III-tubulin (*TUBB3*) and *REG3G* genes in olfactory cells (control, n=4; SZ, n=4) as previously described. The data was shown as relative expression against  $\beta$ -actin mRNA. ND, not detected.

### **Supplementary Figure 2: Representative correlation data of ChIP-seq and microarrays.**

Shown are several representative correlation data. Microsomal glutathione S-transferase 1 (*MGST1*) is localized to endoplasmic reticulum and outer mitochondrial membranes where it is believed to protect these membranes from oxidative stress. Dishevelled associated activator of morphogenesis 2 (*DAAM2*) is involved in Wnt signaling and recently reported to modulate the formation of Wnt receptor complexes in canonical Wnt signal transduction. Note that reciprocal changes occurred in H3K4me3 and H3K27me3 signals at *DAAM2* gene promoters. Con, controls; SZ, schizophrenia.

### **Supplementary Figure 3: No obvious effects of clozapine on *MGST1* mRNA expression in olfactory cells.**

Olfactory cells from control and SZ subjects (control, n=4; SZ, n=4) were cultured in the presence of DMSO (vehicle) or 10  $\mu$ M clozapine for 48 h. *MGST1* mRNA expression was analyzed by quantitative RT-PCR. The data was shown as relative expression of *MGST1* mRNA against  $\beta$ -actin mRNA. Error bars indicate s.e.m.

**Supplementary Table 1: Demographics of SZ patients and control subjects**

| I.D. | Age | Gender | Race | Smoking | Disease duration | Antipsychotic medications<br>[chlorpromazine equivalents mg] | Other medication                                                                        |
|------|-----|--------|------|---------|------------------|--------------------------------------------------------------|-----------------------------------------------------------------------------------------|
| C#1  | 29  | F      | AA   | No      | ---              | ---                                                          | ---                                                                                     |
| C#2  | 28  | M      | C    | No      | ---              | ---                                                          | ---                                                                                     |
| C#3  | 46  | M      | C    | No      | ---              | ---                                                          | ---                                                                                     |
| C#4  | 49  | M      | C    | Yes     | ---              | ---                                                          | ---                                                                                     |
| SZ#1 | 44  | M      | AA   | Yes     | 19               | Fluphenazine 5 mg + Seroquel 400 mg <b>[750 mg]</b>          | Citalopram 20 mg, Trihexyphen 5 mg, Lamictal 25 mg                                      |
| SZ#2 | 45  | M      | AA   | No      | 15               | Zyprexa 15 mg <b>[300 mg]</b>                                | Metformin 500 mg, Pravachol 20 mg, Benadryl 50 mg, Lisinopril 5 mg, Cosopt and Alphagan |
| SZ#3 | 19  | F      | C    | No      | 0.5              | Zyprexa 10 mg + Clozapine 100 mg <b>[400 mg]</b>             | None                                                                                    |
| SZ#4 | 34  | M      | AA   | No      | 17               | Zyprexa 30 mg <b>[600 mg]</b>                                | Lipitor 40 mg                                                                           |

Abbreviation: F/M, Female/Male; AA/C, African American/Caucasian

Note that there are no significant differences between SZ patients and control subjects in age, gender, race, and rate of smoking habits.

**Supplementary Table 2: Genes with significant correlation (p<0.05) between ChIP seq and mcicroarray data among the genes showing SZ-associated changes (p<0.05)**

| GeneSymbol | GeneName                                                                                          | Chr   | Start     | End       | Strand | ChIP seq (H3K4me3)     |        |         | ChIP seq (H3K27me3)    |        |         | Microarray             |        |         | ChIP seq vs Microarray |         |
|------------|---------------------------------------------------------------------------------------------------|-------|-----------|-----------|--------|------------------------|--------|---------|------------------------|--------|---------|------------------------|--------|---------|------------------------|---------|
|            |                                                                                                   |       |           |           |        | FC (log <sub>2</sub> ) | D-stat | p-value | FC (log <sub>2</sub> ) | D-stat | p-value | FC (log <sub>2</sub> ) | D-stat | p-value | r                      | p-value |
| MGST1      | microsomal glutathione S-transferase 1                                                            | chr12 | 16390978  | 16392978  | +      | 0.23                   | 1.68   | 4.7E-02 |                        |        |         | 0.63                   | 2.78   | 1.5E-02 | 0.87                   | 5.5E-03 |
|            |                                                                                                   |       | 16390845  | 16392845  |        | 0.23                   | 1.86   | 3.1E-02 |                        |        |         | 0.63                   | 2.78   | 1.5E-02 | 0.86                   | 6.0E-03 |
|            |                                                                                                   |       | 16390342  | 16392342  |        | 0.25                   | 1.80   | 3.6E-02 |                        |        |         | 0.63                   | 2.78   | 1.5E-02 | 0.85                   | 8.2E-03 |
| WSB1       | WD repeat and SOCS box-containing 1                                                               | chr17 | 22644232  | 22646232  | +      | 0.16                   | 2.00   | 2.3E-02 |                        |        |         | 0.51                   | 3.51   | 5.3E-03 | 0.80                   | 1.8E-02 |
|            |                                                                                                   |       | 120377052 | 120379052 |        |                        |        |         | -0.73                  | -2.16  | 7.8E-03 | 0.39                   | 4.72   | 1.3E-03 | -0.81                  | 1.5E-02 |
| ING3       | inhibitor of growth family, member 3                                                              | chr7  | 120377052 | 120379052 | +      |                        |        |         |                        |        |         | 0.35                   | 2.47   | 2.5E-02 | 0.78                   | 2.1E-02 |
| TAF15      | TAF15 RNA polymerase II, TATA box binding protein (TBP)-associated factor, 68kDa                  | chr17 | 31159600  | 31161600  | +      | 0.23                   | 2.19   | 1.6E-02 |                        |        |         |                        |        |         |                        |         |
| AP1GBP1    | AP1 gamma subunit binding protein 1                                                               | chr17 | 33042558  | 33044558  | +      | 0.26                   | 2.31   | 1.2E-02 |                        |        |         | 0.26                   | 2.71   | 1.7E-02 | 0.81                   | 1.5E-02 |
| RNF31      | ring finger protein 31                                                                            | chr14 | 23685498  | 23687498  | +      | 0.12                   | 1.68   | 4.6E-02 |                        |        |         | 0.05                   | 2.66   | 1.8E-02 | 0.75                   | 3.2E-02 |
| ACO1       | aconitase 1, soluble                                                                              | chr9  | 32373657  | 32375657  | +      |                        |        |         | 0.89                   | 1.58   | 3.9E-02 | -0.24                  | -3.11  | 9.3E-03 | -0.85                  | 1.5E-02 |
| C10orf125  | chromosome 10 open reading frame 125                                                              | chr10 | 135020518 | 135022518 | -      | -0.20                  | -1.67  | 4.8E-02 |                        |        |         | -0.31                  | -2.66  | 1.9E-02 | 0.92                   | 1.1E-03 |
| MF12       | antigen p97 (melanoma associated) identified by monoclonal antibodies 133.2 and 96.5              | chr3  | 198240038 | 198242038 | -      | -0.28                  | -2.41  | 9.9E-03 |                        |        |         | -0.42                  | -4.11  | 2.5E-03 | 0.78                   | 2.2E-02 |
| SMARCD3    | SWI/SNF related, matrix associated, actin dependent regulator of chromatin, subfamily d, member 3 | chr7  | 150575681 | 150577681 | -      | -0.18                  | -1.84  | 3.2E-02 |                        |        |         | -0.44                  | -2.39  | 2.8E-02 | 0.78                   | 2.3E-02 |
| FAM117A    | family with sequence similarity 117, member A                                                     | chr17 | 45195517  | 45197517  | +      | -0.32                  | -3.38  | 1.8E-03 |                        |        |         | -0.44                  | -2.63  | 1.9E-02 | 0.88                   | 4.3E-03 |
| RHOD       | ras homolog gene family, member D                                                                 | chr11 | 66579896  | 66581896  | +      | -0.29                  | -1.99  | 2.5E-02 |                        |        |         | -0.52                  | -2.36  | 3.0E-02 | 0.89                   | 2.9E-03 |
| APLP1      | amyloid beta (A4) precursor-like protein 1                                                        | chr19 | 41050240  | 41052240  | +      | -0.26                  | -2.30  | 1.2E-02 |                        |        |         | -0.52                  | -2.25  | 3.6E-02 | 0.76                   | 2.8E-02 |
| EIF4E3     | eukaryotic translation initiation factor 4E family member                                         | chr3  | 71884464  | 71886464  | -      | -0.30                  | -1.90  | 2.8E-02 |                        |        |         | -0.53                  | -2.43  | 2.7E-02 | 0.72                   | 4.4E-02 |
| HSPC159    | galectin-related protein                                                                          | chr2  | 64534165  | 64536165  | +      | -0.20                  | -2.29  | 1.2E-02 |                        |        |         | -0.57                  | -3.77  | 3.8E-03 | 0.76                   | 2.7E-02 |
| JUP        | junction plakoglobin                                                                              | chr17 | 37195474  | 37197474  | -      | -0.28                  | -2.79  | 4.4E-03 |                        |        |         | -0.58                  | -2.81  | 1.5E-02 | 0.87                   | 5.3E-03 |
| HIP1       | huntingtin interacting protein 1                                                                  | chr7  | 75205214  | 75207214  | -      | -0.22                  | -1.89  | 2.9E-02 |                        |        |         | -0.61                  | -2.05  | 5.0E-02 | 0.92                   | 1.1E-03 |
| C16orf5    | chromosome 16 open reading frame 5                                                                | chr16 | 4527816   | 4529816   | -      | -0.32                  | -2.57  | 8.1E-03 |                        |        |         | -0.67                  | -2.24  | 3.6E-02 | 0.72                   | 4.5E-02 |
| DNASE1L1   | deoxyribonuclease I-like 1                                                                        | chrX  | 153289768 | 153291768 | -      | -0.31                  | -1.90  | 2.8E-02 |                        |        |         | -0.98                  | -3.26  | 7.5E-03 | 0.81                   | 1.4E-02 |
| LPXN       | leupaxin                                                                                          | chr11 | 58098909  | 58100909  | -      | -0.25                  | -1.81  | 3.5E-02 |                        |        |         | -1.16                  | -2.27  | 3.4E-02 | 0.74                   | 3.4E-02 |
| DAAM2      | dishevelled associated activator of morphogenesis 2                                               | chr6  | 39867770  | 39869770  | +      | -0.34                  | -2.98  | 3.3E-03 |                        |        |         | -1.40                  | -2.63  | 1.9E-02 | 0.92                   | 1.3E-03 |
| NMNAT2     | nicotinamide nucleotide adenylyltransferase 2                                                     | chr1  | 181653359 | 181655359 | -      | -0.22                  | -2.06  | 2.1E-02 | 1.41                   | 2.35   | 4.8E-03 | -1.40                  | -2.63  | 1.9E-02 | -0.79                  | 2.0E-02 |
|            |                                                                                                   |       |           |           |        |                        |        |         |                        |        |         | -1.78                  | -2.73  | 1.7E-02 | 0.81                   | 1.6E-02 |



**Supplementary Table 3: 545 pathways altered in SZ patients (ChIP-seq)**

| pathway                                                           | p-value   | q-value   |
|-------------------------------------------------------------------|-----------|-----------|
| ZERBINI_RESPONSE_TO_SULINDAC_UP                                   | <1.00E-16 | <1.00E-16 |
| TURASHVILI_BREAST_NORMAL_DUCTAL_VS_LOBULAR_DN                     | <1.00E-16 | <1.00E-16 |
| TURASHVILI_BREAST_CARCINOMA_DUCTAL_VS_LOBULAR_DN                  | <1.00E-16 | <1.00E-16 |
| CASORELLI_APL_SECONDARY_VS_DE_NOVO_DN                             | <1.00E-16 | <1.00E-16 |
| GARGALOVIC_RESPONSE_TO_OXIDIZED_PHOSPHOLIPIDS_LIGHTYELLOW_DN      | <1.00E-16 | <1.00E-16 |
| TONKS_TARGETS_OF_RUNX1_RUNX1T1_FUSION_SUSTAINED_IN_MONOCYTE_DN    | <1.00E-16 | <1.00E-16 |
| TONKS_TARGETS_OF_RUNX1_RUNX1T1_FUSION_SUSTAINED_IN_ERYTHROCYTE_DN | <1.00E-16 | <1.00E-16 |
| ELVIDGE_HIF2A_TARGETS_UP                                          | <1.00E-16 | <1.00E-16 |
| CASTELLANO_HRAS_TARGETS_UP                                        | <1.00E-16 | <1.00E-16 |
| BERENJENO_TRANSFORMED_BY_RHOA_REVERSIBLY_UP                       | <1.00E-16 | <1.00E-16 |
| LINDGREN_BLADDER_CANCER_CLUSTER_2A_UP                             | <1.00E-16 | <1.00E-16 |
| GAUSSMANN_MLL_AF4_FUSION_TARGETS_B_DN                             | <1.00E-16 | <1.00E-16 |
| GAUSSMANN_MLL_AF4_FUSION_TARGETS_D_DN                             | <1.00E-16 | <1.00E-16 |
| LUCAS_HNF4A_TARGETS_DN                                            | <1.00E-16 | <1.00E-16 |
| TURJANSKI_MAPK8_AND_MAPK9_TARGETS                                 | <1.00E-16 | <1.00E-16 |
| TURJANSKI_MAPK7_TARGETS                                           | <1.00E-16 | <1.00E-16 |
| NAGY_PCAF_COMPONENTS_HUMAN                                        | <1.00E-16 | <1.00E-16 |
| NAKAMURA_BRONCHIAL_AND_BRONCHIOLAR_EPITHELIA                      | <1.00E-16 | <1.00E-16 |
| GALLUZZI_PREVENT_MITOCHONDIAL_PERMEABILIZATION                    | <1.00E-16 | <1.00E-16 |
| MYLLYKANGAS_AMPLIFICATION_HOT_SPOT_21                             | <1.00E-16 | <1.00E-16 |
| HEIDENBLAD_AMPLIFIED_IN_BONE_CANCER                               | <1.00E-16 | <1.00E-16 |
| BEGUM_TARGETS_OF_PAX3_FOXO1_FUSION_AND_PAX3                       | <1.00E-16 | <1.00E-16 |
| KORKOLA_EMBRYONAL_CARCINOMA                                       | <1.00E-16 | <1.00E-16 |
| SCHRAMM_INHBA_TARGETS_DN                                          | <1.00E-16 | <1.00E-16 |
| FUNG_IL2_TARGETS_WITH_STAT5_BINDING_SITES                         | <1.00E-16 | <1.00E-16 |
| RUGO_STRESS_RESPONSE_SUBSET_F                                     | <1.00E-16 | <1.00E-16 |
| SASAKI_TARGETS_OF_TP73_AND_TP63                                   | <1.00E-16 | <1.00E-16 |
| MAINA_HYPOXIA_VHL_TARGETS_UP                                      | <1.00E-16 | <1.00E-16 |
| KONDO_HYPOXIA                                                     | <1.00E-16 | <1.00E-16 |
| JIANG_CORE_DUPLICATION_GENES                                      | <1.00E-16 | <1.00E-16 |
| CAFFAREL_RESPONSE_TO_THC_24HR_3_UP                                | <1.00E-16 | <1.00E-16 |
| STARK_BRAIN_22Q11_DELETION                                        | <1.00E-16 | <1.00E-16 |
| DER_IFN_GAMMA_RESPONSE_DN                                         | <1.00E-16 | <1.00E-16 |
| COLLER_MYC_TARGETS_DN                                             | <1.00E-16 | <1.00E-16 |
| OSAWA_TNF_TARGETS                                                 | <1.00E-16 | <1.00E-16 |
| PARK_HSC_MARKERS                                                  | <1.00E-16 | <1.00E-16 |
| ROETH_TERT_TARGETS_DN                                             | <1.00E-16 | <1.00E-16 |
| STAEGE_EWING_FAMILY_TUMOR                                         | <1.00E-16 | <1.00E-16 |
| MCCOLLUM_GELDANAMYCIN_RESISTANCE_UP                               | <1.00E-16 | <1.00E-16 |
| KYNG_DNA_DAMAGE_BY_4NQO_OR_GAMMA_RADIATION                        | <1.00E-16 | <1.00E-16 |
| KYNG_ENVIRONMENTAL_STRESS_RESPONSE_NOT_BY_UV_IN_WS                | <1.00E-16 | <1.00E-16 |
| KANG_CISPLATIN_RESISTANCE_DN                                      | <1.00E-16 | <1.00E-16 |
| CLAUS_PGR_POSITIVE_MENINGIOMA_UP                                  | <1.00E-16 | <1.00E-16 |
| WALLACE_PROSTATE_CANCER_DN                                        | <1.00E-16 | <1.00E-16 |
| SARRIO_EPITHELIAL_MESENCHYMAL_TRANSITION_DN                       | <1.00E-16 | <1.00E-16 |
| GALI_TP53_TARGETS_APOPTOTIC_DN                                    | <1.00E-16 | <1.00E-16 |
| BASSO_HAIRY_CELL_LEUKEMIA_UP                                      | <1.00E-16 | <1.00E-16 |
| BOQUEST_STEM_CELL_DN                                              | <1.00E-16 | <1.00E-16 |
| BOQUEST_STEM_CELL_CULTURED_VS_FRESH_UP                            | <1.00E-16 | <1.00E-16 |
| ALONSO_METASTASIS_EMT_DN                                          | <1.00E-16 | <1.00E-16 |
| KRISHNAN_FURIN_TARGETS_UP                                         | <1.00E-16 | <1.00E-16 |
| FERRARI_RESPONSE_TO_FENRETINIDE_DN                                | <1.00E-16 | <1.00E-16 |
| BRUNEAU_HEART_GREAT_VESSELS_AND_VALVULOGENESIS                    | <1.00E-16 | <1.00E-16 |
| KAPOSI_LIVER_CANCER_POOR_SURVIVAL_DN                              | <1.00E-16 | <1.00E-16 |
| OKAMOTO_LIVER_CANCER_MULTICENTRIC_OCCURRENCE_UP                   | <1.00E-16 | <1.00E-16 |
| YANAGISAWA_LUNG_CANCER_RECURRENCE                                 | <1.00E-16 | <1.00E-16 |
| WEBER_METHYLATED_ICP_IN_SPERM_UP                                  | <1.00E-16 | <1.00E-16 |
| GUTIERREZ_WALDENSTROEMS_MACROGLOBULINEMIA_1_UP                    | <1.00E-16 | <1.00E-16 |
| MOOTHA_PYR                                                        | <1.00E-16 | <1.00E-16 |
| LY_AGING_OLD_UP                                                   | <1.00E-16 | <1.00E-16 |
| ZEMBUTSU_SENSITIVITY_TO_FLUOROURACIL                              | <1.00E-16 | <1.00E-16 |
| NIELSEN_SYNOVIAL_SARCOMA_UP                                       | <1.00E-16 | <1.00E-16 |
| DASU_IL6_SIGNALING_DN                                             | <1.00E-16 | <1.00E-16 |
| BANDRES_RESPONSE_TO_CARMUSTIN_WITHOUT_MGMT_24HR_DN                | <1.00E-16 | <1.00E-16 |
| U12_DEPENDENT_SPLICEOSOME                                         | <1.00E-16 | <1.00E-16 |
| GLUCAN_METABOLIC_PROCESS                                          | <1.00E-16 | <1.00E-16 |
| HETEROPHILIC_CELL_ADHESION                                        | <1.00E-16 | <1.00E-16 |
| MONOCARBOXYLIC_ACID_TRANSPORT                                     | <1.00E-16 | <1.00E-16 |
| NEGATIVE_REGULATION_OF_CYTOKINE_BIOSYNTHETIC_PROCESS              | <1.00E-16 | <1.00E-16 |
| OXIDOREDUCTASE_ACTIVITY_ACTING_ON_SULFUR_GROUP_OF_DONORS          | <1.00E-16 | <1.00E-16 |
| RNA_POLYMERASE_II_TRANSCRIPTION_MEDIATOR_ACTIVITY                 | <1.00E-16 | <1.00E-16 |
| METABOTROPIC_GlutamateGABA_B_LIKE_RECEPTOR_ACTIVITY               | <1.00E-16 | <1.00E-16 |
| MANNOSYLTRANSFERASE_ACTIVITY                                      | <1.00E-16 | <1.00E-16 |

|                                                           |           |           |
|-----------------------------------------------------------|-----------|-----------|
| CALCIUM_ION_TRANSMEMBRANE_TRANSPORTER_ACTIVITY            | <1.00E-16 | <1.00E-16 |
| HISTONE_DEACETYLASE_BINDING                               | <1.00E-16 | <1.00E-16 |
| IVANOVA_HEMATOPOIESIS_STEM_CELL_SHORT_TERM                | <1.00E-16 | <1.00E-16 |
| NIELSEN_LIPOSARCOMA_UP                                    | <1.00E-16 | <1.00E-16 |
| MOOTHA_ROS                                                | <1.00E-16 | <1.00E-16 |
| BYSTRYKH_HEMATOPOIESIS_STEM_CELL_FGF3                     | <1.00E-16 | <1.00E-16 |
| CHESLER_BRAIN_D6MIT150_QTL_CIS                            | <1.00E-16 | <1.00E-16 |
| CHESLER_BRAIN_QTL_TRANS                                   | <1.00E-16 | <1.00E-16 |
| CHESLER_BRAIN_D6MIT150_QTL_TRANS                          | <1.00E-16 | <1.00E-16 |
| GGCGCA,MIR-371                                            | <1.00E-16 | <1.00E-16 |
| module_0                                                  | <1.00E-16 | <1.00E-16 |
| module_390                                                | <1.00E-16 | <1.00E-16 |
| module_407                                                | <1.00E-16 | <1.00E-16 |
| module_454                                                | <1.00E-16 | <1.00E-16 |
| module_496                                                | <1.00E-16 | <1.00E-16 |
| KEGG_SULFUR_METABOLISM                                    | <1.00E-16 | <1.00E-16 |
| BIOCARTA_ACE2_PATHWAY                                     | <1.00E-16 | <1.00E-16 |
| BIOCARTA_NEUROTRANSMITTERS_PATHWAY                        | <1.00E-16 | <1.00E-16 |
| BIOCARTA_FEEDER_PATHWAY                                   | <1.00E-16 | <1.00E-16 |
| BIOCARTA_GLYCOLYSIS_PATHWAY                               | <1.00E-16 | <1.00E-16 |
| REACTOME_CYTOSOLIC_SULFONATION_OF_SMALL_MOLECULES         | <1.00E-16 | <1.00E-16 |
| REACTOME_HORMONE_LIGAND_BINDING_RECEPTORS                 | <1.00E-16 | <1.00E-16 |
| chr1p11                                                   | <1.00E-16 | <1.00E-16 |
| chr11q                                                    | <1.00E-16 | <1.00E-16 |
| chr6p11                                                   | <1.00E-16 | <1.00E-16 |
| chr4q33                                                   | <1.00E-16 | <1.00E-16 |
| chrXq11                                                   | <1.00E-16 | <1.00E-16 |
| chr21q21                                                  | <1.00E-16 | <1.00E-16 |
| chr13q21                                                  | <1.00E-16 | <1.00E-16 |
| chr4p13                                                   | <1.00E-16 | <1.00E-16 |
| chr3p13                                                   | <1.00E-16 | <1.00E-16 |
| chr2q                                                     | <1.00E-16 | <1.00E-16 |
| chr1p                                                     | <1.00E-16 | <1.00E-16 |
| chr3q11                                                   | <1.00E-16 | <1.00E-16 |
| chr3q                                                     | <1.00E-16 | <1.00E-16 |
| chr4q11                                                   | <1.00E-16 | <1.00E-16 |
| TSAI_DNAJB4_TARGETS_DN                                    | 1.11E-16  | 5.64E-15  |
| MURAKAMI_UV_RESPONSE_1HR_DN                               | 1.11E-16  | 5.64E-15  |
| TAKAYAMA_BOUND_BY_AR                                      | 2.22E-16  | 1.10E-14  |
| YANG_BREAST_CANCER_ESR1_BULK_UP                           | 2.22E-16  | 1.10E-14  |
| REACTOME_SIGNALING_TO_P38_VIA_RIT_AND_RIN                 | 2.22E-16  | 1.10E-14  |
| REGULATION_OF_GENE_SPECIFIC_TRANSCRIPTION                 | 3.33E-16  | 1.63E-14  |
| GOUYER_TUMOR_INVASIVENESS                                 | 4.44E-16  | 2.16E-14  |
| chr19q12                                                  | 5.55E-16  | 2.68E-14  |
| YAGUE_PRETUMOR_DRUG_RESISTANCE_UP                         | 7.77E-16  | 3.72E-14  |
| CELLULAR_RESPONSE_TO_STRESS                               | 8.88E-16  | 4.21E-14  |
| PASTURAL_RIZ1_TARGETS_UP                                  | 1.44E-15  | 6.79E-14  |
| LOPEZ_MESOTHELIOMA_SURVIVAL_WORST_VS_BEST_DN              | 2.22E-15  | 1.04E-13  |
| OLIGOSACCHARYL_TRANSFERASE_COMPLEX                        | 4.88E-15  | 2.26E-13  |
| THUM_MIR21_TARGETS_HEART_DISEASE_DN                       | 5.66E-15  | 2.60E-13  |
| LE_SKI_TARGETS_DN                                         | 1.51E-14  | 6.87E-13  |
| MCCOLLUM_GELDANAMYCIN_RESISTANCE_DN                       | 2.03E-14  | 9.10E-13  |
| V\$SEF1_C                                                 | 2.02E-14  | 9.10E-13  |
| REGULATION_OF_SYNAPSE_STRUCTURE_AND_ACTIVITY              | 2.13E-14  | 9.47E-13  |
| PUJANA_BREAST_CANCER_WITH_BRCA1_MUTATED_DN                | 4.11E-14  | 1.81E-12  |
| XU_RESPONSE_TO_TRETINOIN_DN                               | 5.01E-14  | 2.19E-12  |
| TYROSINE_PHOSPHORYLATION_OF_STAT_PROTEIN                  | 5.44E-14  | 2.36E-12  |
| PEPPER_CHRONIC_LYMPHOCYTIC_LEUKEMIA_DN                    | 7.09E-14  | 3.06E-12  |
| REACTOME_ZINC_INFLUX_INTO_CELLS_BY_THE_SLC39_GENES_FAMILY | 7.39E-14  | 3.16E-12  |
| LIPID_KINASE_ACTIVITY                                     | 7.48E-14  | 3.17E-12  |
| PEPTIDE_METABOLIC_PROCESS                                 | 7.79E-14  | 3.28E-12  |
| YE_METASTATIC_LIVER_CANCER                                | 8.76E-14  | 3.66E-12  |
| CHANG_POU5F1_TARGETS_DN                                   | 1.01E-13  | 4.20E-12  |
| FERRARI_RESPONSE_TO_FENRETINIDE_UP                        | 1.02E-13  | 4.20E-12  |
| MARTIN_INTERACT_WITH_HDAC                                 | 1.49E-13  | 6.11E-12  |
| chr6q26                                                   | 1.86E-13  | 7.55E-12  |
| module_283                                                | 2.01E-13  | 8.10E-12  |
| ST_PAC1_RECEPTOR_PATHWAY                                  | 2.61E-13  | 1.04E-11  |
| CASTELLANO_HRAS_AND_NRAS_TARGETS_UP                       | 3.19E-13  | 1.27E-11  |
| MYLLYKANGAS_AMPLIFICATION_HOT_SPOT_12                     | 3.35E-13  | 1.32E-11  |
| HOEGERKORP_CD44_TARGETS_TEMPORAL_UP                       | 3.56E-13  | 1.40E-11  |
| COLLIS_PRKDC_REGULATORS                                   | 3.83E-13  | 1.49E-11  |
| NUCLEOTIDE_SUGAR_METABOLIC_PROCESS                        | 4.37E-13  | 1.69E-11  |
| BIOPOLYMER_BIOSYNTHETIC_PROCESS                           | 4.87E-13  | 1.87E-11  |
| NEGATIVE_REGULATION_OF_MYELOID_CELL_DIFFERENTIATION       | 5.85E-13  | 2.23E-11  |
| REACTOME_NOTCH_HLH_TRANSCRIPTION_PATHWAY                  | 5.95E-13  | 2.25E-11  |
| RAY_ALZHEIMERS_DISEASE                                    | 6.37E-13  | 2.40E-11  |

|                                                                           |          |          |
|---------------------------------------------------------------------------|----------|----------|
| ST_INTERLEUKIN_13_PATHWAY                                                 | 6.93E-13 | 2.57E-11 |
| ST_IL_13_PATHWAY                                                          | 6.93E-13 | 2.57E-11 |
| ZHAN_VARIABLE_EARLY_DIFFERENTIATION_GENES_UP                              | 7.99E-13 | 2.95E-11 |
| HOEGERKORP_CD44_TARGETS_DIRECT_UP                                         | 8.90E-13 | 3.26E-11 |
| GARGALOVIC_RESPONSE_TO_OXIDIZED_PHOSPHOLIPIDS_BLACK_DN                    | 1.64E-12 | 5.97E-11 |
| DAZARD_UV_RESPONSE_CLUSTER_G5                                             | 1.74E-12 | 6.29E-11 |
| module_144                                                                | 1.78E-12 | 6.40E-11 |
| SU_SALIVARY_GLAND                                                         | 1.94E-12 | 6.94E-11 |
| SMALL_CONJUGATING_PROTEIN_BINDING                                         | 2.51E-12 | 8.92E-11 |
| REACTOME_MTORC1_MEDIATED_SIGNALLING                                       | 2.60E-12 | 9.16E-11 |
| UBIQUITIN_BINDING                                                         | 2.76E-12 | 9.68E-11 |
| HOEGERKORP_CD44_TARGETS_DIRECT_DN                                         | 3.07E-12 | 1.07E-10 |
| ZERBINI_RESPONSE_TO_SULINDAC_DN                                           | 3.34E-12 | 1.16E-10 |
| BIOCARTA_PLATELETAPP_PATHWAY                                              | 3.39E-12 | 1.17E-10 |
| AACGGTT,MIR-451                                                           | 3.56E-12 | 1.22E-10 |
| DETECTION_OF_BIOTIC_STIMULUS                                              | 3.86E-12 | 1.31E-10 |
| NEGATIVE_REGULATION_OF_RESPONSE_TO_STIMULUS                               | 3.96E-12 | 1.34E-10 |
| KYNG_ENVIRONMENTAL_STRESS_RESPONSE_NOT_BY_UV_IN_OLD                       | 4.76E-12 | 1.60E-10 |
| WEBER_METHYLATED_HCP_IN_SPERM_UP                                          | 4.80E-12 | 1.60E-10 |
| MANN_RESPONSE_TO_AMIFOSTINE_DN                                            | 5.10E-12 | 1.69E-10 |
| module_260                                                                | 5.85E-12 | 1.93E-10 |
| MA_PITUITARY_FETAL_VS_ADULT_UP                                            | 7.09E-12 | 2.33E-10 |
| INTERLEUKIN_8_PRODUCTION                                                  | 1.01E-11 | 3.30E-10 |
| module_514                                                                | 1.03E-11 | 3.35E-10 |
| chr9q12                                                                   | 1.11E-11 | 3.59E-10 |
| chr2p                                                                     | 1.38E-11 | 4.42E-10 |
| WILLIAMS_ESR1_TARGETS_DN                                                  | 2.03E-11 | 6.46E-10 |
| BENPORATH_ES_CORE_NINE                                                    | 2.72E-11 | 8.58E-10 |
| chr8q                                                                     | 2.72E-11 | 8.58E-10 |
| LU_TUMOR_VASCULATURE_DN                                                   | 4.22E-11 | 1.32E-09 |
| GALI_TP53_TARGETS_APOPTOTIC_UP                                            | 4.26E-11 | 1.33E-09 |
| REICHERT_G1S_REGULATORS_AS_PI3K_TARGETS                                   | 5.02E-11 | 1.56E-09 |
| SEMBA_FHIT_TARGETS_UP                                                     | 1.06E-10 | 3.27E-09 |
| MYLLYKANGAS_AMPLIFICATION_HOT_SPOT_29                                     | 1.79E-10 | 5.50E-09 |
| GOERING_BLOOD_HDL_CHOLESTEROL_QTL_CIS                                     | 2.22E-10 | 6.78E-09 |
| REACTOME_CLASS_C3_METABOTROPIC_Glutamate_PHEROMONE_RECEPTORS              | 2.37E-10 | 7.18E-09 |
| REACTOME_DEATH_RECEPTOR_SIGNALLING                                        | 2.58E-10 | 7.80E-09 |
| module_140                                                                | 2.64E-10 | 7.94E-09 |
| MARTINELLI_IMMATURE_NEUTROPHIL_UP                                         | 2.70E-10 | 8.05E-09 |
| CHANG_IMMORTALIZED_BY_HP31_UP                                             | 3.16E-10 | 9.37E-09 |
| REACTOME_OTHER_SEMAPHORIN_INTERACTIONS                                    | 3.38E-10 | 1.00E-08 |
| BACOLOD_RESISTANCE_TO_ALKYLATING_AGENTS_UP                                | 3.68E-10 | 1.08E-08 |
| WEBER_METHYLATED_HCP_IN_FIBROBLAST_UP                                     | 5.54E-10 | 1.62E-08 |
| REGULATION_OF_GTPASE_ACTIVITY                                             | 5.84E-10 | 1.70E-08 |
| LUI_THYROID_CANCER_CLUSTER_4                                              | 6.49E-10 | 1.88E-08 |
| REACTOME_BILE_SALT_AND_ORGANIC_ANION_SLC_TRANSPORTERS                     | 6.84E-10 | 1.97E-08 |
| NIELSEN_GIST_AND_SYNOVIAL_SARCOMA_UP                                      | 7.09E-10 | 2.03E-08 |
| SINGLE_STRANDED_RNA_BINDING                                               | 7.42E-10 | 2.11E-08 |
| PURINE_RIBONUCLEOTIDE_METABOLIC_PROCESS                                   | 7.96E-10 | 2.26E-08 |
| HORMONE_BINDING                                                           | 9.32E-10 | 2.62E-08 |
| module_571                                                                | 9.33E-10 | 2.62E-08 |
| TURJANSKI_MAPK14_TARGETS                                                  | 9.83E-10 | 2.75E-08 |
| SA_G2_AND_M_PHASES                                                        | 1.07E-09 | 2.97E-08 |
| KORKOLA_CHORIOCARCINOMA_UP                                                | 1.31E-09 | 3.63E-08 |
| AMIT_EGF_RESPONSE_20_HELA                                                 | 1.40E-09 | 3.87E-08 |
| SHIRAIISHI_PLZF_TARGETS_DN                                                | 1.54E-09 | 4.23E-08 |
| ATPASE_ACTIVITY_COUPLED_TO_TRANSMEMBRANE_MOVEMENT_OF_IONS_PHOSPHORYLATIVE | 1.59E-09 | 4.35E-08 |
| chr7q                                                                     | 1.94E-09 | 5.26E-08 |
| NIKOLSKY_BREAST_CANCER_20P13_AMPLICON                                     | 2.14E-09 | 5.75E-08 |
| DEVELOPMENTAL_GROWTH                                                      | 2.13E-09 | 5.75E-08 |
| PENG_Glutamine_DEPRIVATION_UP                                             | 2.26E-09 | 6.05E-08 |
| MYLLYKANGAS_AMPLIFICATION_HOT_SPOT_9                                      | 2.96E-09 | 7.87E-08 |
| BUCKANOVICH_T_LYMPHOCYTE_HOMING_ON_TUMOR_UP                               | 3.06E-09 | 8.06E-08 |
| INTERACTION_WITH_HOST                                                     | 3.04E-09 | 8.06E-08 |
| ELLWOOD_MYC_TARGETS_UP                                                    | 3.54E-09 | 9.29E-08 |
| PURINE_NUCLEOTIDE_METABOLIC_PROCESS                                       | 4.07E-09 | 1.06E-07 |
| module_391                                                                | 4.62E-09 | 1.20E-07 |
| SCHURINGA_STAT5A_TARGETS_UP                                               | 5.59E-09 | 1.45E-07 |
| WHITESIDE_CISPLATIN_RESISTANCE_DN                                         | 6.55E-09 | 1.69E-07 |
| REACTOME_RETROGRADE_NEUROTROPHIN_SIGNALLING                               | 7.31E-09 | 1.88E-07 |
| GUTIERREZ_WALDENSTROEMS_MACROGLLOBULINEMIA_1_DN                           | 7.41E-09 | 1.89E-07 |
| ZHAN_EARLY_DIFFERENTIATION_GENES_UP                                       | 8.76E-09 | 2.23E-07 |
| FOCAL_ADHESION                                                            | 1.09E-08 | 2.75E-07 |
| SIMBULAN_UV_RESPONSE_NORMAL_UP                                            | 1.17E-08 | 2.95E-07 |
| module_501                                                                | 1.20E-08 | 3.02E-07 |
| REACTOME_ACTIVATION_OF_THE_AP1_FAMILY_OF_TRANSCRIPTION_FACTORS            | 1.25E-08 | 3.12E-07 |
| RAY_TARGETS_OF_P210_BCR_ABL_FUSION_UP                                     | 1.63E-08 | 4.06E-07 |

|                                                                          |          |          |
|--------------------------------------------------------------------------|----------|----------|
| REGULATION_OF_PROTEIN_POLYMERIZATION                                     | 2.16E-08 | 5.35E-07 |
| NAKAJIMA_EOSINOPHIL                                                      | 2.33E-08 | 5.75E-07 |
| chr18q22                                                                 | 2.59E-08 | 6.37E-07 |
| GRAHAM_CML_DIVIDING_VS_NORMAL_DIVIDING_DN                                | 2.92E-08 | 7.13E-07 |
| DACOSTA_LOW_DOSE_UV_RESPONSE_VIA_ERCC3_XPCS_DN                           | 3.06E-08 | 7.45E-07 |
| CLIMENT_BREAST_CANCER_COPY_NUMBER_DN                                     | 3.30E-08 | 7.99E-07 |
| module_293                                                               | 3.37E-08 | 8.14E-07 |
| ACETYLGALACTOSAMINYLTRANSFERASE_ACTIVITY                                 | 3.41E-08 | 8.18E-07 |
| PROTEIN_MATURATION                                                       | 3.42E-08 | 8.19E-07 |
| IIZUKA_LIVER_CANCER_PROGRESSION_G1_G2_UP                                 | 3.48E-08 | 8.28E-07 |
| LYSOSOMAL_TRANSPORT                                                      | 3.49E-08 | 8.28E-07 |
| CHANDRAN_METASTASIS_TOP50_DN                                             | 3.86E-08 | 9.12E-07 |
| SECRETORY_GRANULE                                                        | 4.38E-08 | 1.03E-06 |
| IIZUKA_LIVER_CANCER_PROGRESSION_G2_G3_DN                                 | 4.99E-08 | 1.17E-06 |
| MOROSETTI_FACIOSCAPULOHUMERAL_MUSCULAR_DISTROPHY_DN                      | 6.02E-08 | 1.40E-06 |
| NIELSEN_MALIGNAT_FIBROUS_HISTIOCYTOMA_UP                                 | 6.09E-08 | 1.41E-06 |
| BYSTRYKH_HEMATOPOIESIS_STEM_CELL_FL11                                    | 7.08E-08 | 1.64E-06 |
| KORKOLA_YOLK_SAC_TUMOR_DN                                                | 7.45E-08 | 1.72E-06 |
| module_143                                                               | 8.29E-08 | 1.90E-06 |
| FRASOR_TAMOXIFEN_RESPONSE_DN                                             | 9.25E-08 | 2.11E-06 |
| GENE_SILENCING                                                           | 9.60E-08 | 2.18E-06 |
| EXTRINSIC_TO_PLASMA_MEMBRANE                                             | 1.03E-07 | 2.34E-06 |
| WEST_ADRENOCORITICAL_TUMOR_MARKERS_DN                                    | 1.08E-07 | 2.44E-06 |
| chr22q                                                                   | 1.14E-07 | 2.57E-06 |
| YANG_BREAST_CANCER_ESR1_DN                                               | 1.17E-07 | 2.62E-06 |
| BIOCARTA_RANMS_PATHWAY                                                   | 1.18E-07 | 2.63E-06 |
| AGTGCGT,MIR-521                                                          | 1.37E-07 | 3.03E-06 |
| CYCLASE_ACTIVITY                                                         | 1.40E-07 | 3.10E-06 |
| CELL_MATRIX_JUNCTION                                                     | 1.57E-07 | 3.46E-06 |
| BIOCARTA_PLCE_PATHWAY                                                    | 1.72E-07 | 3.79E-06 |
| REGULATION_OF_BLOOD_PRESSURE                                             | 1.76E-07 | 3.85E-06 |
| VITAMIN_BINDING                                                          | 1.86E-07 | 4.06E-06 |
| NAKAMURA_LUNG_CANCER                                                     | 2.02E-07 | 4.37E-06 |
| NAKAMURA_LUNG_CANCER_MARKERS                                             | 2.02E-07 | 4.37E-06 |
| BIOCARTA_PITX2_PATHWAY                                                   | 2.37E-07 | 5.11E-06 |
| SHIRAISHI_PLZF_TARGETS_UP                                                | 2.47E-07 | 5.30E-06 |
| CELLULAR_RESPONSE_TO_EXTRACELLULAR_STIMULUS                              | 2.70E-07 | 5.77E-06 |
| TESAR_ALK_TARGETS_HUMAN_ES_4D_DN                                         | 3.05E-07 | 6.49E-06 |
| POSITIVE_REGULATION_OF_CYTOSKELETON_ORGANIZATION_AND_BIOGENESIS          | 3.58E-07 | 7.59E-06 |
| CAFFAREL_RESPONSE_TO_THC_8HR_5_DN                                        | 3.61E-07 | 7.64E-06 |
| chr5q                                                                    | 3.72E-07 | 7.84E-06 |
| SPERMATID_DEVELOPMENT                                                    | 4.08E-07 | 8.56E-06 |
| NEUTRAL_AMINO_ACID_TRANSPORT                                             | 4.30E-07 | 8.99E-06 |
| FUNG_IL2_SIGNALING_1                                                     | 4.47E-07 | 9.31E-06 |
| DONATO_CELL_CYCLE_TRETINOIN                                              | 5.17E-07 | 1.07E-05 |
| module_396                                                               | 5.17E-07 | 1.07E-05 |
| NIKOLSKY_BREAST_CANCER_10Q22_AMPLICON                                    | 5.62E-07 | 1.16E-05 |
| chr12q11                                                                 | 5.74E-07 | 1.18E-05 |
| BIOCARTA_CELL2CELL_PATHWAY                                               | 5.92E-07 | 1.21E-05 |
| REGULATION_OF_RAS_GTPASE_ACTIVITY                                        | 6.12E-07 | 1.25E-05 |
| MYLLYKANGAS_AMPLIFICATION_HOT_SPOT_13                                    | 6.74E-07 | 1.36E-05 |
| MCCABE_HOXC6_TARGETS_UP                                                  | 6.69E-07 | 1.36E-05 |
| ANDROGEN_RECEPTOR_SIGNALING_PATHWAY                                      | 7.42E-07 | 1.50E-05 |
| PROTEIN_SERINE_THREONINE_PHOSPHATASE_COMPLEX                             | 7.93E-07 | 1.59E-05 |
| EMBRYO_IMPLANTATION                                                      | 8.23E-07 | 1.65E-05 |
| ZAIDI_OSTEOBLAST_TRANSCRIPTION_FACTORS                                   | 8.42E-07 | 1.68E-05 |
| BIOCARTA_CCR5_PATHWAY                                                    | 8.43E-07 | 1.68E-05 |
| MYOBLAST_DIFFERENTIATION                                                 | 8.72E-07 | 1.73E-05 |
| PIEPOLI_LGI1_TARGETS_UP                                                  | 8.90E-07 | 1.76E-05 |
| MONOSACCHARIDE_BINDING                                                   | 9.26E-07 | 1.82E-05 |
| DING_LUNG_CANCER_MUTATED_RECURRENTLY                                     | 1.01E-06 | 1.97E-05 |
| STEROID_DEHYDROGENASE_ACTIVITY                                           | 1.04E-06 | 2.02E-05 |
| STEROID_DEHYDROGENASE_ACTIVITY_ACTING_ON_THE_CH_OH_GROUP_OF_DONORSNAD_OR | 1.04E-06 | 2.02E-05 |
| module_402                                                               | 1.03E-06 | 2.02E-05 |
| KANG_GIST_WITH_PDGFR_A_UP                                                | 1.05E-06 | 2.03E-05 |
| WONG_IFNA2_RESISTANCE_UP                                                 | 1.18E-06 | 2.27E-05 |
| REACTOME_ACTIVATION_OF_RAC                                               | 1.31E-06 | 2.52E-05 |
| LIU_CDX2_TARGETS_DN                                                      | 1.35E-06 | 2.56E-05 |
| GOUYER_TATI_TARGETS_UP                                                   | 1.35E-06 | 2.56E-05 |
| MUNSHI_MULTIPLE_MYELOMA_DN                                               | 1.35E-06 | 2.56E-05 |
| XU_RESPONSE_TO_TRETINOIN_AND_NSC682994_DN                                | 1.36E-06 | 2.58E-05 |
| PHOSPHOLIPID_TRANSPORTER_ACTIVITY                                        | 1.54E-06 | 2.91E-05 |
| BOYALT_LIVER_CANCER_SUBCLASS_G23_DN                                      | 1.59E-06 | 2.99E-05 |
| BIERIE_INFLAMMATORY_RESPONSE_TGFB1                                       | 1.69E-06 | 3.17E-05 |
| DAVIES_MULTIPLE_MYELOMA_VS_MGUS_UP                                       | 1.72E-06 | 3.21E-05 |
| MAP_KINASE_KINASE_KINASE_ACTIVITY                                        | 1.98E-06 | 3.68E-05 |
| chr13q33                                                                 | 2.09E-06 | 3.87E-05 |

|                                                                          |          |          |
|--------------------------------------------------------------------------|----------|----------|
| module_431                                                               | 2.11E-06 | 3.91E-05 |
| GAUTSCHI_SRC_SIGNALING                                                   | 2.25E-06 | 4.14E-05 |
| MYLLYKANGAS_AMPLIFICATION_HOT_SPOT_27                                    | 2.29E-06 | 4.21E-05 |
| chr16q11                                                                 | 2.60E-06 | 4.77E-05 |
| CHEOK_RESPONSE_TO_MERCAPTOPYRINE_AND_HD_MTX_UP                           | 3.07E-06 | 5.61E-05 |
| MIZUKAMI_HYPOXIA_DN                                                      | 3.15E-06 | 5.74E-05 |
| REGULATION_OF_MUSCLE_CONTRACTION                                         | 3.36E-06 | 6.10E-05 |
| MONOSACCHARIDE_TRANSMEMBRANE_TRANSPORTER_ACTIVITY                        | 3.41E-06 | 6.17E-05 |
| REACTOME_SOS_MEDIATED_SIGNALLING                                         | 3.97E-06 | 7.16E-05 |
| KAUFFMANN_MELANOMA_RELAPSE_DN                                            | 4.14E-06 | 7.42E-05 |
| PROTEIN_AMINO_ACID_O_LINKED_GLYCOSYLATION                                | 4.14E-06 | 7.42E-05 |
| CELL_SUBSTRATE_ADHERENS_JUNCTION                                         | 4.34E-06 | 7.76E-05 |
| module_457                                                               | 4.72E-06 | 8.40E-05 |
| NEUTRAL_AMINO_ACID_TRANSMEMBRANE_TRANSPORTER_ACTIVITY                    | 5.03E-06 | 8.93E-05 |
| SUGAR_TRANSMEMBRANE_TRANSPORTER_ACTIVITY                                 | 5.11E-06 | 9.05E-05 |
| chr14q                                                                   | 5.20E-06 | 9.17E-05 |
| DEACETYLASE_ACTIVITY                                                     | 5.48E-06 | 9.64E-05 |
| PROTEIN_DEACETYLASE_ACTIVITY                                             | 5.54E-06 | 9.71E-05 |
| module_73                                                                | 5.78E-06 | 1.01E-04 |
| SHARMA_ASTROCYTOMA_WITH_NF1_SYNDROM                                      | 5.86E-06 | 1.02E-04 |
| REACTOME_ERKS_ARE_INACTIVATED                                            | 6.47E-06 | 1.12E-04 |
| BIOCARTA_TRKA_PATHWAY                                                    | 6.51E-06 | 1.13E-04 |
| PETRETTO_BLOOD_PRESSURE_DN                                               | 6.74E-06 | 1.16E-04 |
| chr7p12                                                                  | 6.83E-06 | 1.17E-04 |
| chr1q43                                                                  | 7.06E-06 | 1.21E-04 |
| SMID_BREAST_CANCER_RELAPSE_IN_LIVER_DN                                   | 7.21E-06 | 1.23E-04 |
| BIOCARTA_TGFB_PATHWAY                                                    | 7.39E-06 | 1.26E-04 |
| MYLLYKANGAS_AMPLIFICATION_HOT_SPOT_7                                     | 7.59E-06 | 1.29E-04 |
| INTEGRAL_TO_GOLGI_MEMBRANE                                               | 7.83E-06 | 1.33E-04 |
| HEIDENBLAD_AMPLIFIED_IN_SOFT_TISSUE_CANCER                               | 8.52E-06 | 1.44E-04 |
| REACTOME_APOPTOTIC_CLEAVAGE_OF_CELL_ADHESION_PROTEINS                    | 8.58E-06 | 1.45E-04 |
| SPHINGOID_METABOLIC_PROCESS                                              | 8.77E-06 | 1.47E-04 |
| HOFMANN_MYELODYSPLASTIC_SYNDROM_HIGH_RISK_UP                             | 8.88E-06 | 1.49E-04 |
| NIKOLSKY_BREAST_CANCER_1Q32_AMPLICON                                     | 9.09E-06 | 1.52E-04 |
| PROTEIN_STABILIZATION                                                    | 9.16E-06 | 1.52E-04 |
| IGARASHI_ATF4_TARGETS_UP                                                 | 9.46E-06 | 1.57E-04 |
| BIOCARTA_FIBRINOLYSIS_PATHWAY                                            | 1.00E-05 | 1.66E-04 |
| LOPEZ_EPITHELIOID_MESOTHELIOMA                                           | 1.01E-05 | 1.67E-04 |
| KOBAYASHI_RESPONSE_TO_ROMIDEPSIN                                         | 1.02E-05 | 1.68E-04 |
| ANTIPORTER_ACTIVITY                                                      | 1.05E-05 | 1.72E-04 |
| REACTOME_SIGNALING_BY_TGF_BETA                                           | 1.06E-05 | 1.74E-04 |
| MYLLYKANGAS_AMPLIFICATION_HOT_SPOT_5                                     | 1.08E-05 | 1.77E-04 |
| RESPONSE_TO_STEROID_HORMONE_STIMULUS                                     | 1.12E-05 | 1.82E-04 |
| REGULATION_OF_TRANSFORMING_GROWTH_FACTOR_BETA_RECEPTOR_SIGNALING_PATHWAY | 1.15E-05 | 1.86E-04 |
| RODRIGUES_DCC_TARGETS_UP                                                 | 1.22E-05 | 1.96E-04 |
| FRASOR_RESPONSE_TO_SERM_OR_FULVESTRANT_UP                                | 1.31E-05 | 2.12E-04 |
| ST_GNANULE_CELL_SURVIVAL_PATHWAY                                         | 1.34E-05 | 2.15E-04 |
| CHEN_HOXA5_TARGETS_6HR_UP                                                | 1.41E-05 | 2.27E-04 |
| ZHANG_RESPONSE_TO_CANTHARIDIN_UP                                         | 1.43E-05 | 2.29E-04 |
| SMIRNOV_CIRCULATING_ENDOTHELIOCYTES_IN_CANCER_DN                         | 1.44E-05 | 2.29E-04 |
| WU_HBX_TARGETS_1_DN                                                      | 1.45E-05 | 2.30E-04 |
| NIELSEN_GIST_VS_SYNOVIAL_SARCOMA_UP                                      | 1.45E-05 | 2.30E-04 |
| BUDHU_LIVER_CANCER_METASTASIS_UP                                         | 1.47E-05 | 2.32E-04 |
| module_173                                                               | 1.48E-05 | 2.34E-04 |
| CELLULAR_RESPONSE_TO_NUTRIENT_LEVELS                                     | 1.55E-05 | 2.44E-04 |
| module_495                                                               | 1.63E-05 | 2.56E-04 |
| YEMELYANOV_GR_TARGETS_DN                                                 | 1.71E-05 | 2.68E-04 |
| AMYLOID_PRECURSOR_PROTEIN_METABOLIC_PROCESS                              | 1.74E-05 | 2.71E-04 |
| SU_THYMUS                                                                | 1.79E-05 | 2.78E-04 |
| chr3p23                                                                  | 1.81E-05 | 2.81E-04 |
| WONG_IFNA2_RESISTANCE_DN                                                 | 1.82E-05 | 2.81E-04 |
| REGULATION_OF_CELL_CELL_ADHESION                                         | 1.88E-05 | 2.89E-04 |
| IIZUKA_LIVER_CANCER_PROGRESSION_L1_G1_UP                                 | 2.01E-05 | 3.10E-04 |
| POSITIVE_REGULATION_OF_T_CELL_PROLIFERATION                              | 2.05E-05 | 3.14E-04 |
| PROTEIN_TARGETING_TO_MITOCHONDRION                                       | 2.11E-05 | 3.22E-04 |
| CALVET_IRINOTECAN_SENSITIVE_VS_RESISTANT_UP                              | 2.18E-05 | 3.33E-04 |
| KUMAMOTO_RESPONSE_TO_NUTLIN_3A_UP                                        | 2.24E-05 | 3.41E-04 |
| REGULATION_OF_JNK_CASCADE                                                | 2.26E-05 | 3.43E-04 |
| REACTOME_FACILITATIVE_NA_INDEPENDENT_GLUCOSE_TRANSPORTERS                | 2.38E-05 | 3.59E-04 |
| ZEMBUTSU_SENSITIVITY_TO_CISPLATIN                                        | 2.40E-05 | 3.62E-04 |
| IVANOV_MUTATED_IN_COLON_CANCER                                           | 2.49E-05 | 3.74E-04 |
| STEROID_HORMONE_RECEPTOR_BINDING                                         | 2.56E-05 | 3.84E-04 |
| module_377                                                               | 2.56E-05 | 3.84E-04 |
| BIOCARTA_ARENRF2_PATHWAY                                                 | 2.67E-05 | 3.98E-04 |
| LOPEZ_MESOTELIOMA_SURVIVAL_TIME_DN                                       | 2.75E-05 | 4.10E-04 |
| MARTINELLI_IMMATURE_NEUTROPHIL_DN                                        | 2.89E-05 | 4.28E-04 |
| NEGATIVE_REGULATION_OF_SECRETION                                         | 2.89E-05 | 4.28E-04 |

|                                                                             |          |          |
|-----------------------------------------------------------------------------|----------|----------|
| chrXq27                                                                     | 3.00E-05 | 4.44E-04 |
| AUXILIARY_TRANSPORT_PROTEIN_ACTIVITY                                        | 3.01E-05 | 4.44E-04 |
| OUELLET_OVARIAN_CANCER_INVASIVE_VS_LMP_DN                                   | 3.13E-05 | 4.60E-04 |
| REACTOME_VIRAL_DSRNA_TLR3_TRIF_COMPLEX_ACTIVATES_RIP1                       | 3.14E-05 | 4.60E-04 |
| VERRECCHIA_RESPONSE_TO_TGFB1_C4                                             | 3.22E-05 | 4.71E-04 |
| REGULATION_OF_HEART_CONTRACTION                                             | 3.41E-05 | 4.97E-04 |
| FOURNIER_ACINAR_DEVELOPMENT_EARLY_DN                                        | 3.44E-05 | 5.00E-04 |
| NAKAMURA_ALVEOLAR_EPITHELIUM                                                | 3.52E-05 | 5.10E-04 |
| MYLLYKANGAS_AMPLIFICATION_HOT_SPOT_1                                        | 3.53E-05 | 5.10E-04 |
| IIZUKA_LIVER_CANCER_PROGRESSION_L0_L1_DN                                    | 3.55E-05 | 5.13E-04 |
| BIOCARTA_TOB1_PATHWAY                                                       | 3.59E-05 | 5.17E-04 |
| BYSTRYKH_HEMATOPOIESIS_STEM_CELL_IL3RA                                      | 3.83E-05 | 5.50E-04 |
| DISTECHE_ESCAPED_FROM_X_INACTIVATION                                        | 3.88E-05 | 5.56E-04 |
| MYLLYKANGAS_AMPLIFICATION_HOT_SPOT_16                                       | 3.99E-05 | 5.70E-04 |
| V\$EV1_01                                                                   | 4.06E-05 | 5.79E-04 |
| module_178                                                                  | 4.12E-05 | 5.85E-04 |
| HINATA_NFKB_TARGETS_KERATINOCYTE_DN                                         | 4.42E-05 | 6.27E-04 |
| INTERFERON_GAMMA_BIOSYNTHETIC_PROCESS                                       | 4.54E-05 | 6.42E-04 |
| CASTELLANO_HRAS_AND_NRAS_TARGETS_DN                                         | 4.64E-05 | 6.55E-04 |
| NGO_MALIGNANT_GLIOMA_1P_LOH                                                 | 4.90E-05 | 6.89E-04 |
| REACTOME_STEROID_HORMONE_BIOSYNTHESIS                                       | 4.97E-05 | 6.98E-04 |
| SYNAPTOGENESIS                                                              | 5.30E-05 | 7.42E-04 |
| PROTEIN_SERINE_THREONINE_TYROSINE_KINASE_ACTIVITY                           | 5.45E-05 | 7.61E-04 |
| AEROBIC_RESPIRATION                                                         | 5.61E-05 | 7.80E-04 |
| chr19p                                                                      | 5.60E-05 | 7.80E-04 |
| SCHUHMACHER_MYC_TARGETS_DN                                                  | 5.80E-05 | 8.00E-04 |
| HSC_MATURE_FETAL                                                            | 5.80E-05 | 8.00E-04 |
| REACTOME_RNA_POLYMERASE_III_TRANSCRIPTION_TERMINATION                       | 5.79E-05 | 8.00E-04 |
| PASTURAL_RIZ1_TARGETS_DN                                                    | 5.85E-05 | 8.05E-04 |
| AMINO_ACID_DERIVATIVE_BIOSYNTHETIC_PROCESS                                  | 5.92E-05 | 8.12E-04 |
| MURAKAMI_UV_RESPONSE_1HR_UP                                                 | 6.44E-05 | 8.80E-04 |
| BIOCARTA_IL3_PATHWAY                                                        | 6.44E-05 | 8.80E-04 |
| LIU_CMYB_TARGETS_DN                                                         | 7.28E-05 | 9.90E-04 |
| FUNG_IL2_SIGNALING_2                                                        | 7.28E-05 | 9.90E-04 |
| chr3q24                                                                     | 7.38E-05 | 9.98E-04 |
| chr13q22                                                                    | 7.37E-05 | 9.98E-04 |
| REGULATION_OF_INTERFERON_GAMMA_BIOSYNTHETIC_PROCESS                         | 7.40E-05 | 9.99E-04 |
| STEGMEIER_PRE-MITOTIC_CELL_CYCLE_REGULATORS                                 | 7.50E-05 | 1.01E-03 |
| HU_ANGIOGENESIS_UP                                                          | 7.84E-05 | 1.05E-03 |
| TRACEY_RESISTANCE_TO_IFNA2_DN                                               | 7.88E-05 | 1.06E-03 |
| RESPONSE_TO_TOXIN                                                           | 7.93E-05 | 1.06E-03 |
| ENDOTHELIAL_CELL_PROLIFERATION                                              | 8.11E-05 | 1.08E-03 |
| CELL_SOMA                                                                   | 8.34E-05 | 1.11E-03 |
| chr11p                                                                      | 8.35E-05 | 1.11E-03 |
| ZEMBUTSU_SENSITIVITY_TO_NIMUSTINE                                           | 8.54E-05 | 1.13E-03 |
| GRAHAM_CML_QUIESCENT_VS_CML_DIVIDING_DN                                     | 8.77E-05 | 1.16E-03 |
| BIOGENIC_AMINE_METABOLIC_PROCESS                                            | 8.82E-05 | 1.16E-03 |
| BIOCARTA_P35ALZHEIMERS_PATHWAY                                              | 8.90E-05 | 1.17E-03 |
| LIPID_HOMEOSTASIS                                                           | 9.37E-05 | 1.23E-03 |
| STEROL_BINDING                                                              | 9.54E-05 | 1.25E-03 |
| DNA_MODIFICATION                                                            | 9.63E-05 | 1.26E-03 |
| MODY_HIPPOCAMPUS_POSTNATAL                                                  | 9.71E-05 | 1.27E-03 |
| CELLULAR_MONOVALENT_INORGANIC_CATION_HOMEOSTASIS                            | 9.77E-05 | 1.27E-03 |
| NIKOLSKY_BREAST_CANCER_19P13_AMPLICON                                       | 9.98E-05 | 1.30E-03 |
| REACTOME_ASSOCIATION_OF_LICENSING_FACTORS_WITH_THE_PREREPLICATIVE_COMPLEX   | 1.00E-04 | 1.30E-03 |
| module_190                                                                  | 1.02E-04 | 1.32E-03 |
| OXFORD_RALA_AND_RALB_TARGETS_UP                                             | 1.02E-04 | 1.32E-03 |
| AMINOPEPTIDASE_ACTIVITY                                                     | 1.03E-04 | 1.33E-03 |
| PETRETTO_BLOOD_PRESSURE_UP                                                  | 1.04E-04 | 1.33E-03 |
| TESAR_ALK_TARGETS_HUMAN_ES_5D_DN                                            | 1.05E-04 | 1.34E-03 |
| module_513                                                                  | 1.07E-04 | 1.37E-03 |
| INTERFERON_GAMMA_PRODUCTION                                                 | 1.11E-04 | 1.41E-03 |
| PYEON_HP_V_POSITIVE_TUMORS_DN                                               | 1.13E-04 | 1.44E-03 |
| CGGTGTG,MIR-220                                                             | 1.13E-04 | 1.44E-03 |
| CGTCTTA,MIR-208                                                             | 1.14E-04 | 1.44E-03 |
| ALDO_KETO_REDUCTASE_ACTIVITY                                                | 1.15E-04 | 1.45E-03 |
| GCGCCTT,MIR-525,MIR-524                                                     | 1.16E-04 | 1.46E-03 |
| REGULATION_OF_CELLULAR_PH                                                   | 1.19E-04 | 1.50E-03 |
| TURJANSKI_MAPK1_AND_MAPK2_TARGETS                                           | 1.24E-04 | 1.55E-03 |
| BIOCARTA_VDR_PATHWAY                                                        | 1.42E-04 | 1.78E-03 |
| REACTOME_HUMAN_TAK1_ACTIVATES_NFKB_BY_PHOSPHORYLATION_AND_ACTIVATION_OF_IKK | 1.49E-04 | 1.86E-03 |
| WANG_RESPONSE_TO_PACLITAXEL_VIA_MAPK8_UP                                    | 1.50E-04 | 1.87E-03 |
| LIU_BREAST_CANCER                                                           | 1.53E-04 | 1.90E-03 |
| module_539                                                                  | 1.55E-04 | 1.92E-03 |
| KEGG_RIBOFLAVIN_METABOLISM                                                  | 1.59E-04 | 1.97E-03 |
| NIELSEN_SYNOVIAL_SARCOMA_DN                                                 | 1.60E-04 | 1.97E-03 |
| SMALL_CONJUGATING_PROTEIN_SPECIFIC_PROTEASE_ACTIVITY                        | 1.73E-04 | 2.13E-03 |

|                                                                           |          |          |
|---------------------------------------------------------------------------|----------|----------|
| CYCLIC_NUCLEOTIDE_METABOLIC_PROCESS                                       | 1.74E-04 | 2.14E-03 |
| KYNG_ENVIRONMENTAL_STRESS_RESPONSE_NOT_BY_GAMMA_IN_WS                     | 1.77E-04 | 2.17E-03 |
| REGULATION_OF_PROTEIN_SECRETION                                           | 1.83E-04 | 2.24E-03 |
| REACTOME_GLUCURONIDATION                                                  | 1.84E-04 | 2.24E-03 |
| GNF2_TNFSF10                                                              | 1.90E-04 | 2.31E-03 |
| VERNELL_RETINOBLASTOMA_PATHWAY_DN                                         | 1.91E-04 | 2.33E-03 |
| module_423                                                                | 1.98E-04 | 2.40E-03 |
| SHI_SPARC_TARGETS_DN                                                      | 2.00E-04 | 2.43E-03 |
| KEGG_TERPENOID_BACKBONE_BIOSYNTHESIS                                      | 2.04E-04 | 2.46E-03 |
| MEINHOLD_OVARIAN_CANCER_LOW_GRADE_UP                                      | 2.11E-04 | 2.55E-03 |
| chr13q31                                                                  | 2.17E-04 | 2.61E-03 |
| module_470                                                                | 2.19E-04 | 2.63E-03 |
| MARSON_FOXP3_TARGETS_STIMULATED_DN                                        | 2.28E-04 | 2.73E-03 |
| POSITIVE_REGULATION_OF_ANGIOGENESIS                                       | 2.35E-04 | 2.81E-03 |
| AMIT_DELAYED_EARLY_GENES                                                  | 2.36E-04 | 2.82E-03 |
| BIOCARTA_CTL_PATHWAY                                                      | 2.38E-04 | 2.83E-03 |
| module_231                                                                | 2.39E-04 | 2.85E-03 |
| PROTEIN_IMPORT_INTO_NUCLEUS_TRANSLOCATION                                 | 2.41E-04 | 2.86E-03 |
| BOYLAN_MULTIPLE_MYELOMA_PCA1_DN                                           | 2.44E-04 | 2.89E-03 |
| REACTOME_CALCITONIN_LIKE_LIGAND_RECEPTORS                                 | 2.47E-04 | 2.92E-03 |
| NEGATIVE_REGULATION_OF_ANGIOGENESIS                                       | 2.49E-04 | 2.93E-03 |
| NF_KAPPA_B_BINDING                                                        | 2.49E-04 | 2.93E-03 |
| AMUNDSON_DNA_DAMAGE_RESPONSE_TP53                                         | 2.54E-04 | 2.98E-03 |
| MITOTIC_SPINDLE_ORGANIZATION_AND_BIOGENESIS                               | 2.58E-04 | 3.02E-03 |
| BIOCARTA_SKP2E2F_PATHWAY                                                  | 2.79E-04 | 3.27E-03 |
| LUJ_THYROID_CANCER_CLUSTER_3                                              | 2.87E-04 | 3.35E-03 |
| NEBEN_AML_WITH_FLT3_OR_NRAS_DN                                            | 2.94E-04 | 3.42E-03 |
| MYLLYKANGAS_AMPLIFICATION_HOT_SPOT_22                                     | 3.01E-04 | 3.49E-03 |
| CGCAAAA_MIR-450                                                           | 3.07E-04 | 3.56E-03 |
| KIM_RESPONSE_TO_TSA_AND_DECITABINE_DN                                     | 3.14E-04 | 3.62E-03 |
| TCGATGG_MIR-213                                                           | 3.14E-04 | 3.62E-03 |
| FOURNIER_ACINAR_DEVELOPMENT_EARLY_UP                                      | 3.21E-04 | 3.69E-03 |
| RODRIGUES_THYROID_CARCINOMA_UP                                            | 3.33E-04 | 3.82E-03 |
| LOPEZ_MESOTHELIOMA_SURVIVAL_WORST_VS_BEST_UP                              | 3.36E-04 | 3.85E-03 |
| MILICIC_FAMILIAL_ADENOMATOUS_POLYPOSIS_DN                                 | 3.38E-04 | 3.87E-03 |
| module_335                                                                | 3.40E-04 | 3.89E-03 |
| OHASHI_AURKB_TARGETS                                                      | 3.48E-04 | 3.97E-03 |
| REACTOME_CDC6_ASSOCIATION_WITH_THE_ORC_ORIGIN_COMPLEX                     | 3.57E-04 | 4.06E-03 |
| BIOCARTA_SRCRPTP_PATHWAY                                                  | 3.76E-04 | 4.27E-03 |
| SCHLESINGER_METHYLATED_IN_COLON_CANCER                                    | 3.94E-04 | 4.46E-03 |
| REGULATION_OF_ENDOTHELIAL_CELL_PROLIFERATION                              | 4.05E-04 | 4.58E-03 |
| ROY_WOUND_BLOOD_VESSEL_DN                                                 | 4.12E-04 | 4.64E-03 |
| chr17q                                                                    | 4.12E-04 | 4.64E-03 |
| REGULATION_OF_T_CELL_PROLIFERATION                                        | 4.17E-04 | 4.69E-03 |
| VACUOLAR_TRANSPORT                                                        | 4.18E-04 | 4.69E-03 |
| NUCLEOTIDE_BIOSYNTHETIC_PROCESS                                           | 4.21E-04 | 4.72E-03 |
| CERAMIDE_METABOLIC_PROCESS                                                | 4.36E-04 | 4.87E-03 |
| REACTOME_A_THIRD_PROTEOLYTIC_CLEAVAGE_RELEASES_NICD                       | 4.46E-04 | 4.97E-03 |
| COFACTOR_TRANSPORTER_ACTIVITY                                             | 4.56E-04 | 5.08E-03 |
| NIELSEN_LEIOMYOSARCOMA_DN                                                 | 4.92E-04 | 5.46E-03 |
| REGULATION_OF_HORMONE_SECRETION                                           | 4.95E-04 | 5.48E-03 |
| CATION_TRANSPORTING_ATPASE_ACTIVITY                                       | 4.94E-04 | 5.48E-03 |
| KEGG_TAURINE_AND_HYPOTAURINE_METABOLISM                                   | 5.12E-04 | 5.65E-03 |
| REACTOME_BASE_FREE_SUGAR_PHOSPHATE_REMOVAL_VIA_THE_SINGLE_NUCLEOTIDE_REPL | 5.18E-04 | 5.71E-03 |
| CARBOHYDRATE_TRANSMEMBRANE_TRANSPORTER_ACTIVITY                           | 5.36E-04 | 5.90E-03 |
| MILICIC_FAMILIAL_ADENOMATOUS_POLYPOSIS_UP                                 | 5.54E-04 | 6.08E-03 |
| SULFUR_COMPOUND_BIOSYNTHETIC_PROCESS                                      | 5.76E-04 | 6.31E-03 |
| HETEROGENEOUS_NUCLEAR_RIBONUCLEOPROTEIN_COMPLEX                           | 5.80E-04 | 6.34E-03 |
| module_540                                                                | 6.05E-04 | 6.60E-03 |
| ROZANOV_MMP14_CORRELATED                                                  | 6.10E-04 | 6.63E-03 |
| MURAKAMI_UV_RESPONSE_6HR_DN                                               | 6.09E-04 | 6.63E-03 |
| NEGATIVE_REGULATION_OF_PHOSPHORYLATION                                    | 6.18E-04 | 6.70E-03 |
| WANG_ESOPHAGUS_CANCER_PROGRESSION_UP                                      | 6.33E-04 | 6.85E-03 |
| ENDOCYTIC_VESICLE                                                         | 6.33E-04 | 6.85E-03 |
| EPITHELIAL_TO_MESENCHYMAL_TRANSITION                                      | 6.35E-04 | 6.85E-03 |
| LAMB_CCND1_TARGETS                                                        | 6.50E-04 | 6.99E-03 |
| chr9p12                                                                   | 6.51E-04 | 6.99E-03 |
| BIOCARTA_ASBCCELL_PATHWAY                                                 | 6.60E-04 | 7.08E-03 |
| CHANDRAN_METASTASIS_TOP50_UP                                              | 6.90E-04 | 7.39E-03 |
| NUCLEAR_CHROMATIN                                                         | 6.97E-04 | 7.45E-03 |
| VITAMIN_METABOLIC_PROCESS                                                 | 7.12E-04 | 7.59E-03 |
| TASTE_RECEPTOR_ACTIVITY                                                   | 7.14E-04 | 7.60E-03 |
| chr11p12                                                                  | 7.19E-04 | 7.64E-03 |
| CHIN_BREAST_CANCER_COPY_NUMBER_UP                                         | 7.27E-04 | 7.71E-03 |
| REACTOME_Glutamate_NEUROTRANSMITTER_RELEASE_CYCLE                         | 7.35E-04 | 7.78E-03 |
| TESAR_ALK_TARGETS_HUMAN_ES_5D_UP                                          | 7.54E-04 | 7.97E-03 |
| OXIDOREDUCTASE_ACTIVITY_ACTING_ON_THE_CH_NH_GROUP_OF_DONORS               | 7.61E-04 | 8.03E-03 |

|                                                                           |          |          |
|---------------------------------------------------------------------------|----------|----------|
| FINAK_BREAST_CANCER_SDPP_SIGNATURE                                        | 7.95E-04 | 8.37E-03 |
| chr5p14                                                                   | 8.16E-04 | 8.57E-03 |
| MODY_HIPPOCAMPUS_NEONATAL                                                 | 8.36E-04 | 8.77E-03 |
| BUKANOVICH_T_LYMPHOCYTE_HOMING_ON_TUMOR_DN                                | 8.40E-04 | 8.79E-03 |
| FRIDMAN_SENESCENCE_DN                                                     | 8.55E-04 | 8.93E-03 |
| REACTOME_SYNTHESIS_OF_BILE_ACIDS_AND_BILE_SALTS_VIA_24_HYDROXYCHOLESTEROL | 8.86E-04 | 9.24E-03 |
| SPINDLE_POLE                                                              | 9.10E-04 | 9.47E-03 |
| ACTIN_FILAMENT_BUNDLE_FORMATION                                           | 9.15E-04 | 9.51E-03 |
| NUCLEOBASENUCLEOSIDENUCLEOTIDE_AND_NUCLEIC_ACID_TRANSMEMBRANE_TRANSPORTE  | 9.41E-04 | 9.76E-03 |
| CARBOXY_LYASE_ACTIVITY                                                    | 9.48E-04 | 9.81E-03 |



**Supplementary Table 4: 517 pathways altered in SZ patients (gene expression microarray)**

| pathway                                            | p-value   | q-value   |
|----------------------------------------------------|-----------|-----------|
| PYEON_HPV_POSITIVE_TUMORS_DN                       | <1.00E-16 | <1.00E-16 |
| KORKOLA_YOLK_SAC_TUMOR_DN                          | <1.00E-16 | <1.00E-16 |
| KOBAYASHI_EGFR_SIGNALING_6HR_UP                    | <1.00E-16 | <1.00E-16 |
| PIEPOLI_LGI1_TARGETS_DN                            | <1.00E-16 | <1.00E-16 |
| LIU_CMYB_TARGETS_DN                                | <1.00E-16 | <1.00E-16 |
| PEPPER_CHRONIC_LYMPHOCYTIC_LEUKEMIA_DN             | <1.00E-16 | <1.00E-16 |
| LINDGRÉN_BLADDER_CANCER_CLUSTER_2A_UP              | <1.00E-16 | <1.00E-16 |
| GAUSSMANN_MLL_AF4_FUSION_TARGETS_B_DN              | <1.00E-16 | <1.00E-16 |
| ZIRN_TRETINOIN_RESPONSE_DN                         | <1.00E-16 | <1.00E-16 |
| IVANOV_MUTATED_IN_COLON_CANCER                     | <1.00E-16 | <1.00E-16 |
| TURJANSKI_MAPK1_AND_MAPK2_TARGETS                  | <1.00E-16 | <1.00E-16 |
| TURJANSKI_MAPK8_AND_MAPK9_TARGETS                  | <1.00E-16 | <1.00E-16 |
| TURJANSKI_MAPK7_TARGETS                            | <1.00E-16 | <1.00E-16 |
| MYLLYKANGAS_AMPLIFICATION_HOT_SPOT_9               | <1.00E-16 | <1.00E-16 |
| MYLLYKANGAS_AMPLIFICATION_HOT_SPOT_22              | <1.00E-16 | <1.00E-16 |
| PATTERSON_DOCETAXEL_RESISTANCE                     | <1.00E-16 | <1.00E-16 |
| XU_HGF_TARGETS_REPRESSED_BY_AKT1_UP                | <1.00E-16 | <1.00E-16 |
| XU_AKT1_TARGETS_48HR                               | <1.00E-16 | <1.00E-16 |
| DACOSTA_LOW_DOSE_UV_RESPONSE_VIA_ERCC3_XPCS_UP     | <1.00E-16 | <1.00E-16 |
| HEIDENBLAD_AMPLICON_12P11_12_UP                    | <1.00E-16 | <1.00E-16 |
| MANN_RESPONSE_TO_AMIFOSTINE_DN                     | <1.00E-16 | <1.00E-16 |
| SIMBULAN_UV_RESPONSE_NORMAL_UP                     | <1.00E-16 | <1.00E-16 |
| GOUYER_TATI_TARGETS_UP                             | <1.00E-16 | <1.00E-16 |
| STARK_BRAIN_22Q11_DELETION                         | <1.00E-16 | <1.00E-16 |
| PENG_Glutamine_Déprivation_UP                      | <1.00E-16 | <1.00E-16 |
| IIZUKA_LIVER_CANCER_PROGRESSION_G1_G2_UP           | <1.00E-16 | <1.00E-16 |
| WONG_IFNA2_RESISTANCE_DN                           | <1.00E-16 | <1.00E-16 |
| OSAWA_TNF_TARGETS                                  | <1.00E-16 | <1.00E-16 |
| SCHURINGA_STAT5A_TARGETS_UP                        | <1.00E-16 | <1.00E-16 |
| XU_RESPONSE_TO_TRETINOIN_DN                        | <1.00E-16 | <1.00E-16 |
| RORIE_TARGETS_OF_EWSR1_FLI1_FUSION_DN              | <1.00E-16 | <1.00E-16 |
| MARSON_FOXP3_TARGETS_STIMULATED_DN                 | <1.00E-16 | <1.00E-16 |
| KYNG_ENVIRONMENTAL_STRESS_RESPONSE_NOT_BY_UV_IN_WS | <1.00E-16 | <1.00E-16 |
| GALI_TP53_TARGETS_APOPTOTIC_DN                     | <1.00E-16 | <1.00E-16 |
| BOQUEST_STEM_CELL_DN                               | <1.00E-16 | <1.00E-16 |
| YAGUE_PRETUMOR_DRUG_RESISTANCE_DN                  | <1.00E-16 | <1.00E-16 |
| CONRAD_GERMLINE_STEM_CELL                          | <1.00E-16 | <1.00E-16 |
| THUM_MIR21_TARGETS_HEART_DISEASE_DN                | <1.00E-16 | <1.00E-16 |
| KRISHNAN_FURIN_TARGETS_UP                          | <1.00E-16 | <1.00E-16 |
| KRISHNAN_FURIN_TARGETS_DN                          | <1.00E-16 | <1.00E-16 |
| FIRESTEIN_CTNNB1_PATHWAY_AND_PROLIFERATION         | <1.00E-16 | <1.00E-16 |
| PALOMERO_GSI_SENSITIVITY_UP                        | <1.00E-16 | <1.00E-16 |
| MARTINELLI_IMMATURE_NEUTROPHIL_DN                  | <1.00E-16 | <1.00E-16 |
| RAY_TARGETS_OF_P210_BCR_ABL_FUSION_UP              | <1.00E-16 | <1.00E-16 |
| LEE_NAIVE_T_LYMPHOCYTE                             | <1.00E-16 | <1.00E-16 |
| VALK_AML_WITH_T_8_21_TRANSLOCATION                 | <1.00E-16 | <1.00E-16 |
| BOYALT_LIVER_CANCER_SUBCLASS_G23_DN                | <1.00E-16 | <1.00E-16 |
| SEIKE_LUNG_CANCER_POOR_SURVIVAL                    | <1.00E-16 | <1.00E-16 |
| TSAL_DNAJB4_TARGETS_DN                             | <1.00E-16 | <1.00E-16 |
| DORN_ADENOVIRUS_INFECTION_24HR_UP                  | <1.00E-16 | <1.00E-16 |
| EXTERNAL_SIDE_OF_PLASMA_MEMBRANE                   | <1.00E-16 | <1.00E-16 |
| GROWTH_CONE                                        | <1.00E-16 | <1.00E-16 |
| REGULATION_OF_DEFENSE_RESPONSE                     | <1.00E-16 | <1.00E-16 |
| TISSUE_MORPHOGENESIS                               | <1.00E-16 | <1.00E-16 |
| SYNAPTOGENESIS                                     | <1.00E-16 | <1.00E-16 |
| ISOPRENOID_METABOLIC_PROCESS                       | <1.00E-16 | <1.00E-16 |
| FEMALE_GAMETE_GENERATION                           | <1.00E-16 | <1.00E-16 |
| REGULATION_OF_LIPID_METABOLIC_PROCESS              | <1.00E-16 | <1.00E-16 |
| PHOSPHOLIPASE_C_ACTIVATION                         | <1.00E-16 | <1.00E-16 |
| MAINTENANCE_OF_CELLULAR_LOCALIZATION               | <1.00E-16 | <1.00E-16 |
| NEGATIVE_REGULATION_OF_ANGIOGENESIS                | <1.00E-16 | <1.00E-16 |
| MONOCARBOXYLIC_ACID_TRANSPORT                      | <1.00E-16 | <1.00E-16 |
| INTERLEUKIN_8_BIOSYNTHETIC_PROCESS                 | <1.00E-16 | <1.00E-16 |
| PEPTIDE_METABOLIC_PROCESS                          | <1.00E-16 | <1.00E-16 |
| FEEDING_BEHAVIOR                                   | <1.00E-16 | <1.00E-16 |
| INTERLEUKIN_2_PRODUCTION                           | <1.00E-16 | <1.00E-16 |
| INTERLEUKIN_8_PRODUCTION                           | <1.00E-16 | <1.00E-16 |
| MORPHOGENESIS_OF_AN_EPITHELIUM                     | <1.00E-16 | <1.00E-16 |
| KERATINOCYTE_DIFFERENTIATION                       | <1.00E-16 | <1.00E-16 |
| BILE_ACID_METABOLIC_PROCESS                        | <1.00E-16 | <1.00E-16 |
| ESTABLISHMENT_OF_VESICLE_LOCALIZATION              | <1.00E-16 | <1.00E-16 |
| LYSOSOMAL_TRANSPORT                                | <1.00E-16 | <1.00E-16 |
| POSITIVE_REGULATION_OF_DNA_METABOLIC_PROCESS       | <1.00E-16 | <1.00E-16 |

|                                                                             |           |           |
|-----------------------------------------------------------------------------|-----------|-----------|
| VESICLE_LOCALIZATION                                                        | <1.00E-16 | <1.00E-16 |
| MAINTENANCE_OF_CELLULAR_PROTEIN_LOCALIZATION                                | <1.00E-16 | <1.00E-16 |
| POSITIVE_REGULATION_OF_ANGIOGENESIS                                         | <1.00E-16 | <1.00E-16 |
| NEGATIVE_REGULATION_OF_MYELOID_CELL_DIFFERENTIATION                         | <1.00E-16 | <1.00E-16 |
| ACTIN_FILAMENT_BASED_MOVEMENT                                               | <1.00E-16 | <1.00E-16 |
| GENE_SILENCING                                                              | <1.00E-16 | <1.00E-16 |
| REGULATION_OF_ENDOTHELIAL_CELL_PROLIFERATION                                | <1.00E-16 | <1.00E-16 |
| VITAMIN_BINDING                                                             | <1.00E-16 | <1.00E-16 |
| NON_MEMBRANE_SPANNING_PROTEIN_TYROSINE_KINASE_ACTIVITY                      | <1.00E-16 | <1.00E-16 |
| ORGANIC_ANION_TRANSMEMBRANE_TRANSPORTER_ACTIVITY                            | <1.00E-16 | <1.00E-16 |
| HYDROLASE_ACTIVITY_HYDROLYZING_N_GLYCOSYL_COMPOUNDS                         | <1.00E-16 | <1.00E-16 |
| 3_5_CYCLIC_NUCLEOTIDE_PHOSPHODIESTERASE_ACTIVITY                            | <1.00E-16 | <1.00E-16 |
| DEAMINASE_ACTIVITY                                                          | <1.00E-16 | <1.00E-16 |
| TRANSMEMBRANE_RECEPTOR_PROTEIN_PHOSPHATASE_ACTIVITY                         | <1.00E-16 | <1.00E-16 |
| PROTEIN_SERINE_THREONINE_TYROSINE_KINASE_ACTIVITY                           | <1.00E-16 | <1.00E-16 |
| TRANSITION_METAL_ION_TRANSMEMBRANE_TRANSPORTER_ACTIVITY                     | <1.00E-16 | <1.00E-16 |
| WHITESIDE_CISPLATIN_RESISTANCE_DN                                           | <1.00E-16 | <1.00E-16 |
| ABE_VEGFA_TARGETS                                                           | <1.00E-16 | <1.00E-16 |
| BYSTRYKH_HEMATOPOIESIS_STEM_CELL_FL11                                       | <1.00E-16 | <1.00E-16 |
| V\$HOXA3_01                                                                 | <1.00E-16 | <1.00E-16 |
| AGCGCTT,MIR-518F,MIR-518E,MIR-518A                                          | <1.00E-16 | <1.00E-16 |
| CGGTGTG,MIR-220                                                             | <1.00E-16 | <1.00E-16 |
| ACCGAGC,MIR-423                                                             | <1.00E-16 | <1.00E-16 |
| CGTCTTA,MIR-208                                                             | <1.00E-16 | <1.00E-16 |
| module_96                                                                   | <1.00E-16 | <1.00E-16 |
| module_140                                                                  | <1.00E-16 | <1.00E-16 |
| module_141                                                                  | <1.00E-16 | <1.00E-16 |
| module_211                                                                  | <1.00E-16 | <1.00E-16 |
| module_283                                                                  | <1.00E-16 | <1.00E-16 |
| module_328                                                                  | <1.00E-16 | <1.00E-16 |
| module_354                                                                  | <1.00E-16 | <1.00E-16 |
| module_376                                                                  | <1.00E-16 | <1.00E-16 |
| module_390                                                                  | <1.00E-16 | <1.00E-16 |
| module_401                                                                  | <1.00E-16 | <1.00E-16 |
| module_410                                                                  | <1.00E-16 | <1.00E-16 |
| module_423                                                                  | <1.00E-16 | <1.00E-16 |
| module_465                                                                  | <1.00E-16 | <1.00E-16 |
| module_467                                                                  | <1.00E-16 | <1.00E-16 |
| module_470                                                                  | <1.00E-16 | <1.00E-16 |
| module_543                                                                  | <1.00E-16 | <1.00E-16 |
| module_545                                                                  | <1.00E-16 | <1.00E-16 |
| KEGG_PRIMARY_BILE_ACID_BIOSYNTHESIS                                         | <1.00E-16 | <1.00E-16 |
| KEGG_RENIN_ANGIOTENSIN_SYSTEM                                               | <1.00E-16 | <1.00E-16 |
| KEGG_ASTHMA                                                                 | <1.00E-16 | <1.00E-16 |
| BIOCARTA_ASBCCELL_PATHWAY                                                   | <1.00E-16 | <1.00E-16 |
| BIOCARTA_CYTOKINE_PATHWAY                                                   | <1.00E-16 | <1.00E-16 |
| BIOCARTA_EPONFKB_PATHWAY                                                    | <1.00E-16 | <1.00E-16 |
| BIOCARTA_FEEDER_PATHWAY                                                     | <1.00E-16 | <1.00E-16 |
| BIOCARTA_FIBRINOLYSIS_PATHWAY                                               | <1.00E-16 | <1.00E-16 |
| BIOCARTA_IL17_PATHWAY                                                       | <1.00E-16 | <1.00E-16 |
| BIOCARTA_PTC1_PATHWAY                                                       | <1.00E-16 | <1.00E-16 |
| REACTOME_A_THIRD_PROTEOLYTIC_CLEAVAGE_RELEASES_NICD                         | <1.00E-16 | <1.00E-16 |
| REACTOME_BASE_FREE_SUGAR_PHOSPHATE_REMOVAL_VIA_THE_SINGLE_NUCLEOTIDE_REPL   | <1.00E-16 | <1.00E-16 |
| REACTOME_COMMON_PATHWAY                                                     | <1.00E-16 | <1.00E-16 |
| REACTOME_E2F_ENABLED_INHIBITION_OF_PRE_REPLICATION_COMPLEX_FORMATION        | <1.00E-16 | <1.00E-16 |
| REACTOME_FACILITATIVE_NA_INDEPENDENT_GLUCOSE_TRANSPORTERS                   | <1.00E-16 | <1.00E-16 |
| REACTOME_P75NTR_RECRUITS_SIGNALLING_COMPLEXES                               | <1.00E-16 | <1.00E-16 |
| REACTOME_P75NTR_SIGNALS_VIA_NFKB                                            | <1.00E-16 | <1.00E-16 |
| REACTOME_PHASE_1_FUNCTIONALIZATION                                          | <1.00E-16 | <1.00E-16 |
| REACTOME_PHOSPHORYLATION_OF_CD3_AND_TCR_ZETA_CHAINS                         | <1.00E-16 | <1.00E-16 |
| REACTOME_RECYCLING_OF_BILE_ACIDS_AND_SALTS                                  | <1.00E-16 | <1.00E-16 |
| REACTOME_RESOLUTION_OF_AP_SITES_VIA_THE_SINGLE_NUCLEOTIDE_REPLACEMENT_PATHV | <1.00E-16 | <1.00E-16 |
| REACTOME_TRANSLOCATION_OF_ZAP70_TO_IMMUNOLOGICAL_SYNAPSE                    | <1.00E-16 | <1.00E-16 |
| REACTOME_JNK_PHOSPHORYLATION_AND_ACTIVATION_MEDIATED_BY_ACTIVATED_HUMAN_TAP | <1.00E-16 | <1.00E-16 |
| REACTOME_BILE_SALT_AND_ORGANIC_ANION_SLC_TRANSPORTERS                       | <1.00E-16 | <1.00E-16 |
| REACTOME_GLUCURONIDATION                                                    | <1.00E-16 | <1.00E-16 |
| REACTOME_SHC_MEDIATED_CASCADE                                               | <1.00E-16 | <1.00E-16 |
| REACTOME_GAP_JUNCTION_ASSEMBLY                                              | <1.00E-16 | <1.00E-16 |
| REACTOME_GAP_JUNCTION_DEGRADATION                                           | <1.00E-16 | <1.00E-16 |
| REACTOME_APOPTOSIS_INDUCED_DNA_FRAGMENTATION                                | <1.00E-16 | <1.00E-16 |
| chr13q11                                                                    | <1.00E-16 | <1.00E-16 |
| chryp11                                                                     | <1.00E-16 | <1.00E-16 |
| chr2q22                                                                     | <1.00E-16 | <1.00E-16 |
| chr2p                                                                       | <1.00E-16 | <1.00E-16 |
| chr19p                                                                      | <1.00E-16 | <1.00E-16 |
| chr12p                                                                      | <1.00E-16 | <1.00E-16 |
| chr5p14                                                                     | <1.00E-16 | <1.00E-16 |

|                                                                             |           |           |
|-----------------------------------------------------------------------------|-----------|-----------|
| chr11p12                                                                    | <1.00E-16 | <1.00E-16 |
| chr2p15                                                                     | <1.00E-16 | <1.00E-16 |
| chr3p13                                                                     | <1.00E-16 | <1.00E-16 |
| chr13q33                                                                    | <1.00E-16 | <1.00E-16 |
| chr1p                                                                       | <1.00E-16 | <1.00E-16 |
| chr6p                                                                       | <1.00E-16 | <1.00E-16 |
| chr4q11                                                                     | <1.00E-16 | <1.00E-16 |
| ST_INTERLEUKIN_13_PATHWAY                                                   | <1.00E-16 | <1.00E-16 |
| ST_IL_13_PATHWAY                                                            | <1.00E-16 | <1.00E-16 |
| SA_FAS_SIGNALING                                                            | <1.00E-16 | <1.00E-16 |
| TONKS_TARGETS_OF_RUNX1_RUNX1T1_FUSION_ERYTHROCYTE_DN                        | 1.11E-16  | 4.53E-15  |
| FARMER_BREAST_CANCER_CLUSTER_8                                              | 1.11E-16  | 4.53E-15  |
| WALLACE_PROSTATE_CANCER_DN                                                  | 1.11E-16  | 4.53E-15  |
| GUTIERREZ_WALDENSTROEMS_MACROGLOBULINEMIA_1_DN                              | 1.11E-16  | 4.53E-15  |
| CHIARETTI_T_ALL_RELAPSE_PROGNOSIS                                           | 1.11E-16  | 4.53E-15  |
| T_CELL_PROLIFERATION                                                        | 1.11E-16  | 4.53E-15  |
| WONG_ENDOMETRIUM_CANCER_UP                                                  | 2.22E-16  | 8.95E-15  |
| KANG_CISPLATIN_RESISTANCE_DN                                                | 2.22E-16  | 8.95E-15  |
| TCGATGG_MIR-213                                                             | 3.33E-16  | 1.33E-14  |
| NEGATIVE_REGULATION_OF_BINDING                                              | 5.55E-16  | 2.21E-14  |
| BIOCARTA_KREB_PATHWAY                                                       | 8.88E-16  | 3.52E-14  |
| KYNG_ENVIRONMENTAL_STRESS_RESPONSE_NOT_BY_4NQO_IN_OLD                       | 9.99E-16  | 3.93E-14  |
| BIOCARTA GRANULOCYTES_PATHWAY                                               | 1.33E-15  | 5.21E-14  |
| SENSORY_PERCEPTION_OF_CHEMICAL_STIMULUS                                     | 3.22E-15  | 1.25E-13  |
| LUCAS_HNF4A_TARGETS_DN                                                      | 3.55E-15  | 1.37E-13  |
| ENDOTHELIAL_CELL_MIGRATION                                                  | 4.11E-15  | 1.58E-13  |
| CARBOHYDRATE_TRANSMEMBRANE_TRANSPORTER_ACTIVITY                             | 4.88E-15  | 1.87E-13  |
| WONG_IFNA2_RESISTANCE_UP                                                    | 7.66E-15  | 2.91E-13  |
| NEGATIVE_REGULATION_OF_TRANSCRIPTION_FACTOR_ACTIVITY                        | 1.22E-14  | 4.62E-13  |
| SASAKI_TARGETS_OF_TP73_AND_TP63                                             | 1.52E-14  | 5.72E-13  |
| MAINA_HYPOXIA_VHL_TARGETS_UP                                                | 1.71E-14  | 6.39E-13  |
| JIANG_CORE_DUPLICATION_GENES                                                | 1.73E-14  | 6.44E-13  |
| REACTOME_CREB_PHOSPHORYLATION_THROUGH_THE_ACTIVATION_OF_CAMKII              | 2.92E-14  | 1.08E-12  |
| TURJANSKI_MAPK14_TARGETS                                                    | 3.00E-14  | 1.10E-12  |
| BALLIF_DEVELOPMENTAL_DISABILITY_P16_P12_DELETION                            | 3.56E-14  | 1.30E-12  |
| NEGATIVE_REGULATION_OF_DNA_BINDING                                          | 6.06E-14  | 2.21E-12  |
| module_65                                                                   | 6.20E-14  | 2.24E-12  |
| chr6q15                                                                     | 7.41E-14  | 2.67E-12  |
| REACTOME_SYNTHESIS_OF_BILE_ACIDS_AND_BILE_SALTS_VIA_7ALPHA_HYDROXYCHOLESTER | 8.73E-14  | 3.12E-12  |
| REACTOME_SYNTHESIS_OF_BILE_ACIDS_AND_BILE_SALTS                             | 9.66E-14  | 3.44E-12  |
| SCIAN_INVERSED_TARGETS_OF_TP53_AND_TP73_UP                                  | 1.46E-13  | 5.19E-12  |
| HISTONE_METHYLTRANSFERASE_ACTIVITY                                          | 5.01E-13  | 1.77E-11  |
| MYLLYKANGAS_AMPLIFICATION_HOT_SPOT_27                                       | 5.49E-13  | 1.92E-11  |
| POSITIVE_REGULATION_OF_CELL_MIGRATION                                       | 8.88E-13  | 3.10E-11  |
| GNF2_TTN                                                                    | 1.39E-12  | 4.84E-11  |
| MIZUKAMI_HYPOXIA_UP                                                         | 1.58E-12  | 5.46E-11  |
| LOPEZ_MESOTHELIOMA_SURVIVAL_UP                                              | 1.65E-12  | 5.67E-11  |
| NUCLEAR_REPLICATION_FORK                                                    | 1.73E-12  | 5.89E-11  |
| module_428                                                                  | 1.73E-12  | 5.89E-11  |
| FOURNIER_ACINAR_DEVELOPMENT_LATE_UP                                         | 2.25E-12  | 7.62E-11  |
| module_560                                                                  | 2.40E-12  | 8.09E-11  |
| NIKOLSKY_BREAST_CANCER_14Q22_AMPLICON                                       | 3.50E-12  | 1.17E-10  |
| REGULATION_OF_MEMBRANE_POTENTIAL                                            | 4.02E-12  | 1.34E-10  |
| RICKMAN_HEAD_AND_NECK_CANCER_D                                              | 4.28E-12  | 1.41E-10  |
| REACTOME_APOPTOTIC_CLEAVAGE_OF_CELL_ADHESION_PROTEINS                       | 4.27E-12  | 1.41E-10  |
| UNFOLDED_PROTEIN_RESPONSE                                                   | 4.86E-12  | 1.60E-10  |
| REACTOME_CD28_DEPENDENT_PI3K_AKT_SIGNALING                                  | 5.80E-12  | 1.90E-10  |
| KORKOLA_TERATOMA_DN                                                         | 7.66E-12  | 2.49E-10  |
| LAU_APOPTOSIS_CDKN2A_DN                                                     | 9.79E-12  | 3.17E-10  |
| RESPIRATORY_GASEOUS_EXCHANGE                                                | 1.35E-11  | 4.35E-10  |
| MONOSACCHARIDE_TRANSMEMBRANE_TRANSPORTER_ACTIVITY                           | 1.36E-11  | 4.35E-10  |
| FINETTI_BREAST_CANCER_KINOME_GREEN                                          | 1.43E-11  | 4.57E-10  |
| chr2q34                                                                     | 1.58E-11  | 5.03E-10  |
| SUGAR_TRANSMEMBRANE_TRANSPORTER_ACTIVITY                                    | 1.86E-11  | 5.88E-10  |
| FUNG_IL2_TARGETS_WITH_STAT5_BINDING_SITES                                   | 1.92E-11  | 6.05E-10  |
| BIOCARTA_EIF2_PATHWAY                                                       | 1.96E-11  | 6.15E-10  |
| LEE_INTRATHYMIC_T_PROGENITOR                                                | 2.13E-11  | 6.64E-10  |
| VITAMIN_TRANSPORT                                                           | 2.31E-11  | 7.18E-10  |
| MONTERO_THYROID_CANCER_POOR_SURVIVAL_UP                                     | 2.37E-11  | 7.34E-10  |
| CHESLER_BRAIN_QTL_TRANS                                                     | 2.95E-11  | 9.09E-10  |
| BYSTRYKH_SCP2_QTL                                                           | 3.51E-11  | 1.07E-09  |
| chr14q                                                                      | 3.51E-11  | 1.07E-09  |
| KYNG_ENVIRONMENTAL_STRESS_RESPONSE_NOT_BY_UV_IN_OLD                         | 3.54E-11  | 1.07E-09  |
| REACTOME_COPI_MEDIATED_TRANSPORT                                            | 4.33E-11  | 1.31E-09  |
| LIPID_KINASE_ACTIVITY                                                       | 6.25E-11  | 1.88E-09  |
| HEDVAT_ELF4_TARGETS_UP                                                      | 8.51E-11  | 2.55E-09  |
| CASPASE_REGULATOR_ACTIVITY                                                  | 1.05E-10  | 3.12E-09  |

|                                                                           |          |          |
|---------------------------------------------------------------------------|----------|----------|
| MARTIN_INTERACT_WITH_HDAC                                                 | 1.39E-10 | 4.13E-09 |
| GABA_RECEPTOR_ACTIVITY                                                    | 2.46E-10 | 7.27E-09 |
| module_236                                                                | 2.61E-10 | 7.69E-09 |
| BANDRES_RESPONSE_TO_CARMUSTIN_WITHOUT_MGMT_24HR_DN                        | 2.65E-10 | 7.77E-09 |
| ANION_CATION_SYMPORTER_ACTIVITY                                           | 2.89E-10 | 8.42E-09 |
| GAUTSCHI_SRC_SIGNALING                                                    | 3.02E-10 | 8.79E-09 |
| GLUCOSE_CATABOLIC_PROCESS                                                 | 4.34E-10 | 1.26E-08 |
| POTASSIUM_CHANNEL_REGULATOR_ACTIVITY                                      | 4.42E-10 | 1.27E-08 |
| BANDRES_RESPONSE_TO_CARMUSTIN_MGMT_24HR_DN                                | 4.45E-10 | 1.28E-08 |
| BOQUEST_STEM_CELL_CULTURED_VS_FRESH_UP                                    | 4.55E-10 | 1.30E-08 |
| NUCLEAR_UBIQUITIN_LIGASE_COMPLEX                                          | 4.57E-10 | 1.30E-08 |
| REACTOME_TRAFFICKING_OF_GLUR2_CONTAINING_AMPA_RECEPTORS                   | 4.90E-10 | 1.39E-08 |
| module_407                                                                | 5.03E-10 | 1.42E-08 |
| KEGG_TAURINE_AND_HYPOTAURINE_METABOLISM                                   | 5.57E-10 | 1.56E-08 |
| REGULATION_OF_PEPTIDYL_TYROSINE_PHOSPHORYLATION                           | 6.36E-10 | 1.78E-08 |
| CHASSOT_SKIN_WOUND                                                        | 6.39E-10 | 1.78E-08 |
| VACUOLAR_TRANSPORT                                                        | 1.26E-09 | 3.48E-08 |
| MURATA_VIRULENCE_OF_H_PILORI                                              | 1.27E-09 | 3.50E-08 |
| module_58                                                                 | 1.32E-09 | 3.63E-08 |
| MAP_KINASE_KINASE_ACTIVITY                                                | 1.53E-09 | 4.18E-08 |
| WEBER_METHYLATED_HCP_IN_SPERM_DN                                          | 1.73E-09 | 4.73E-08 |
| TURASHVILI_BREAST_NORMAL_DUCTAL_VS_LOBULAR_DN                             | 1.85E-09 | 5.02E-08 |
| GLUCOSAMINE_METABOLIC_PROCESS                                             | 2.05E-09 | 5.56E-08 |
| PHOSPHATASE_INHIBITOR_ACTIVITY                                            | 2.12E-09 | 5.73E-08 |
| REACTOME_ACTIVATION_OF_THE_AP1_FAMILY_OF_TRANSCRIPTION_FACTORS            | 2.17E-09 | 5.83E-08 |
| BIOCARTA_IL4_PATHWAY                                                      | 2.99E-09 | 8.00E-08 |
| NIELSEN_GIST_AND_SYNOVIAL_SARCOMA_UP                                      | 3.77E-09 | 1.01E-07 |
| module_424                                                                | 4.73E-09 | 1.26E-07 |
| SCHUHMACHER_MYC_TARGETS_DN                                                | 5.17E-09 | 1.37E-07 |
| OHM_EMBRYONIC_CARCINOMA_DN                                                | 6.23E-09 | 1.64E-07 |
| DNA_DAMAGE_RESPONSESIGNAL_TRANSDUCTION_BY_P53_CLASS_MEDIATOR              | 1.02E-08 | 2.69E-07 |
| DEFENSE_RESPONSE_TO_VIRUS                                                 | 1.19E-08 | 3.10E-07 |
| INOSITOL_OR_PHOSPHATIDYLINOSITOL_PHOSPHODIESTERASE_ACTIVITY               | 1.21E-08 | 3.16E-07 |
| ZHAN_VARIABLE_EARLY_DIFFERENTIATION_GENES_UP                              | 1.22E-08 | 3.16E-07 |
| REACTOME_UNFOLDED_PROTEIN_RESPONSE                                        | 1.23E-08 | 3.17E-07 |
| REACTOME_ACTIVATED_TAK1_MEDIATES_P38_MAPK_ACTIVATION                      | 1.25E-08 | 3.20E-07 |
| POSITIVE_REGULATION_OF_CYTOKINE_PRODUCTION                                | 1.38E-08 | 3.54E-07 |
| module_130                                                                | 1.45E-08 | 3.70E-07 |
| MYLLYKANGAS_AMPLIFICATION_HOT_SPOT_15                                     | 1.66E-08 | 4.23E-07 |
| TRICARBOXYLIC_ACID_CYCLE_INTERMEDIATE_METABOLIC_PROCESS                   | 1.68E-08 | 4.26E-07 |
| CASTELLANO_HRAS_AND_NRAS_TARGETS_DN                                       | 1.90E-08 | 4.81E-07 |
| BIOCARTA_IL5_PATHWAY                                                      | 2.05E-08 | 5.16E-07 |
| KUROKAWA_LIVER_CANCER_EARLY_RECURRENCE_DN                                 | 2.36E-08 | 5.90E-07 |
| N_ACETYLGLUCOSAMINE_METABOLIC_PROCESS                                     | 2.49E-08 | 6.21E-07 |
| TIAN_TNF_SIGNALING_NOT_VIA_NFKB                                           | 2.80E-08 | 6.96E-07 |
| REACTOME_HORMONE_SENSITIVE_LIPASE_HSL_MEDIATED_TRIACYLGLYCEROL_HYDROLYSIS | 3.21E-08 | 7.95E-07 |
| INTERCALATED_DISC                                                         | 3.22E-08 | 7.96E-07 |
| WAESCH_ANAPHASE_PROMOTING_COMPLEX                                         | 3.53E-08 | 8.68E-07 |
| KEGG_PROXIMAL_TUBULE_BICARBONATE_RECLAMATION                              | 3.56E-08 | 8.74E-07 |
| FUCOSYLTRANSFERASE_ACTIVITY                                               | 3.75E-08 | 9.17E-07 |
| RESPONSE_TO_STEROID_HORMONE_STIMULUS                                      | 3.87E-08 | 9.43E-07 |
| SPHINGOLIPID_BIOSYNTHETIC_PROCESS                                         | 3.95E-08 | 9.59E-07 |
| PARK_HSC_MARKERS                                                          | 4.86E-08 | 1.17E-06 |
| module_429                                                                | 5.02E-08 | 1.21E-06 |
| REACTOME_REGULATION_OF_RHEB_GTPASE_ACTIVITY_BY_AMPK                       | 5.66E-08 | 1.36E-06 |
| REACTOME_MRNA_DECAY_BY_3_TO_5_EXORIBONUCLEASE                             | 5.91E-08 | 1.41E-06 |
| HASLINGER_B_CELL_WITH_MUTATED_VH_GENES                                    | 6.16E-08 | 1.47E-06 |
| PDZ_DOMAIN_BINDING                                                        | 6.74E-08 | 1.60E-06 |
| ROETH_TERT_TARGETS_UP                                                     | 6.77E-08 | 1.60E-06 |
| ST_PAC1_RECEPTOR_PATHWAY                                                  | 7.49E-08 | 1.77E-06 |
| BIOCARTA_PARKIN_PATHWAY                                                   | 7.68E-08 | 1.80E-06 |
| REACTOME_FGFR_LIGAND_BINDING_AND_ACTIVATION                               | 8.63E-08 | 2.02E-06 |
| REACTOME_NRF1_SIGNALS_CELL_DEATH_FROM_THE_NUCLEUS                         | 9.30E-08 | 2.17E-06 |
| chrXq27                                                                   | 9.39E-08 | 2.18E-06 |
| FUNG_IL2_SIGNALING_1                                                      | 1.01E-07 | 2.33E-06 |
| chr6q13                                                                   | 1.09E-07 | 2.52E-06 |
| GUTIERREZ_WALDENSTROEMS_MACROGLOBULINEMIA_1_UP                            | 1.14E-07 | 2.62E-06 |
| MALE_GONAD_DEVELOPMENT                                                    | 1.24E-07 | 2.83E-06 |
| TURJANSKI_MAPK11_TARGETS                                                  | 1.28E-07 | 2.93E-06 |
| PROTEIN_MATURATION                                                        | 1.45E-07 | 3.31E-06 |
| COFACTOR_TRANSPORT                                                        | 1.52E-07 | 3.45E-06 |
| FINAK_BREAST_CANCER_SDPD_SIGNATURE                                        | 1.67E-07 | 3.79E-06 |
| REACTOME_XENOBIOTICS                                                      | 1.72E-07 | 3.87E-06 |
| KONDO_HYPOXIA                                                             | 2.06E-07 | 4.64E-06 |
| PROTEIN_IMPORT_INTO_NUCLEUS_TRANSLOCATION                                 | 2.16E-07 | 4.85E-06 |
| MONOCARBOXYLIC_ACID_TRANSMEMBRANE_TRANSPORTER_ACTIVITY                    | 2.62E-07 | 5.84E-06 |
| REACTOME_NOTCH_HLH_TRANSCRIPTION_PATHWAY                                  | 2.88E-07 | 6.41E-06 |

|                                                                          |          |             |
|--------------------------------------------------------------------------|----------|-------------|
| INNATE_IMMUNE_RESPONSE                                                   | 2.95E-07 | 6.56E-06    |
| GNF2_SERPINI2                                                            | 3.04E-07 | 6.72E-06    |
| PERIPHERAL_NERVOUS_SYSTEM_DEVELOPMENT                                    | 3.07E-07 | 6.76E-06    |
| CASORELLI_APL_SECONDARY_VS_DE_NOVO_DN                                    | 3.75E-07 | 8.23E-06    |
| CHESLER_BRAIN_D6MIT150_QTL_CIS                                           | 3.77E-07 | 8.26E-06    |
| REACTOME_PECAM1_INTERACTIONS                                             | 3.79E-07 | 8.27E-06    |
| MYLLYKANGAS_AMPLIFICATION_HOT_SPOT_24                                    | 5.42E-07 | 1.18E-05    |
| module_404                                                               | 5.59E-07 | 1.21E-05    |
| DNA_MODIFICATION                                                         | 6.95E-07 | 1.50E-05    |
| CELLULAR_RESPONSE_TO_EXTRACELLULAR_STIMULUS                              | 7.05E-07 | 1.52E-05    |
| chr1p12                                                                  | 8.35E-07 | 1.80E-05    |
| BIOCARTA_CACAM_PATHWAY                                                   | 8.47E-07 | 1.81E-05    |
| POSITIVE_REGULATION_OF_EPITHELIAL_CELL_PROLIFERATION                     | 8.97E-07 | 1.92E-05    |
| NEUTRAL_AMINO_ACID_TRANSPORT                                             | 1.01E-06 | 2.16E-05    |
| module_31                                                                | 1.10E-06 | 2.33E-05    |
| RODRIGUES_DCC_TARGETS_UP                                                 | 1.22E-06 | 2.57E-05    |
| GOUYER_TATI_TARGETS_DN                                                   | 1.30E-06 | 2.73E-05    |
| module_540                                                               | 1.33E-06 | 2.80E-05    |
| MATTIOLI_MULTIPLE_MYELOMA_SUBGROUPS                                      | 1.36E-06 | 2.86E-05    |
| MAINTENANCE_OF_PROTEIN_LOCALIZATION                                      | 1.49E-06 | 3.12E-05    |
| GLYCOSPHINGOLIPID_METABOLIC_PROCESS                                      | 1.65E-06 | 3.43E-05    |
| TYROSINE_PHOSPHORYLATION_OF_STAT_PROTEIN                                 | 2.05E-06 | 4.27E-05    |
| SITE_OF_POLARIZED_GROWTH                                                 | 2.24E-06 | 4.64E-05    |
| REGULATION_OF_TYROSINE_PHOSPHORYLATION_OF_STAT_PROTEIN                   | 2.27E-06 | 4.69E-05    |
| VERRECCHIA_RESPONSE_TO_TGFB1_C6                                          | 2.46E-06 | 5.07E-05    |
| WANG_RECURRENT_LIVER_CANCER_DN                                           | 2.51E-06 | 5.15E-05    |
| module_39                                                                | 2.61E-06 | 5.33E-05    |
| TRACEY_RESISTANCE_TO_IFNA2_DN                                            | 2.73E-06 | 5.57E-05    |
| chr4q24                                                                  | 2.80E-06 | 5.69E-05    |
| KEGG_TASTE_TRANSDUCTION                                                  | 2.81E-06 | 5.69E-05    |
| CAFFAREL_RESPONSE_TO_THC_24HR_3_UP                                       | 3.24E-06 | 6.54E-05    |
| IIZUKA_LIVER_CANCER_PROGRESSION_L1_G1_UP                                 | 3.67E-06 | 7.40E-05    |
| ARYLSULFATASE_ACTIVITY                                                   | 3.71E-06 | 7.45E-05    |
| REACTOME_ADENYLATE_CYCLASE_ACTIVATING_PATHWAY                            | 3.74E-06 | 7.49E-05    |
| REGULATION_OF_NEUROGENESIS                                               | 3.97E-06 | 7.92E-05    |
| LIANG_HEMATOPOIESIS_STEM_CELL_NUMBER_QTL                                 | 3.99E-06 | 7.94E-05    |
| HEMATOPOIETIN_INTERFERON_CLASSD200_DOMAIN_CYTOKINE_RECEPTOR_BINDING      | 4.21E-06 | 8.35E-05    |
| BIOCARTA_SRCRPTP_PATHWAY                                                 | 4.22E-06 | 8.35E-05    |
| HASLINGER_B_CLL_WITH_CHROMOSOME_12_TRISOMY                               | 4.38E-06 | 8.64E-05    |
| GALE_APL_WITH_FLT3_MUTATED_DN                                            | 4.52E-06 | 8.89E-05    |
| SCHWAB_TARGETS_OF_BMYB_S427G_DN                                          | 4.88E-06 | 9.55E-05    |
| SCHWAB_TARGETS_OF_BMYB_I624M_DN                                          | 4.88E-06 | 9.55E-05    |
| REACTOME_GAMMA_CARBOXYLATION_TRANSPORT_AND_AMINO_TERMINAL_CLEAVAGE_OF_PR | 4.90E-06 | 9.57E-05    |
| KUMAMOTO_RESPONSE_TO_NUTLIN_3A_UP                                        | 5.03E-06 | 9.77E-05    |
| COLLIS_PRKDC_REGULATORS                                                  | 5.17E-06 | 0.000100231 |
| KANG_FLUOROURACIL_RESISTANCE_DN                                          | 5.22E-06 | 0.000100866 |
| MONOOXYGENASE_ACTIVITY                                                   | 5.32E-06 | 0.000102532 |
| GLAND_DEVELOPMENT                                                        | 5.36E-06 | 0.000102967 |
| TRANSITION_METAL_ION_TRANSPORT                                           | 5.61E-06 | 0.000107498 |
| module_194                                                               | 5.66E-06 | 0.000107843 |
| module_464                                                               | 5.65E-06 | 0.000107843 |
| NIKOLSKY_BREAST_CANCER_19P13_AMPLICON                                    | 5.75E-06 | 0.00010932  |
| module_538                                                               | 6.17E-06 | 0.000116896 |
| GNF2_IGF1                                                                | 6.21E-06 | 0.000117366 |
| PHOSPHOLIPID_TRANSPORTER_ACTIVITY                                        | 6.56E-06 | 0.000123674 |
| GLUTATHIONE_TRANSFERASE_ACTIVITY                                         | 6.63E-06 | 0.000124714 |
| REICHERT_G1S_REGULATORS_AS_PI3K_TARGETS                                  | 6.66E-06 | 0.000124887 |
| IIZUKA_LIVER_CANCER_PROGRESSION_L0_L1_UP                                 | 7.03E-06 | 0.000131401 |
| ISHIKAWA_STING_SIGNALING                                                 | 7.29E-06 | 0.000135516 |
| SYNAPTIC_VESICLE                                                         | 7.29E-06 | 0.000135516 |
| REACTOME_NA_CL_DEPENDENT_NEUROTRANSMITTER_TRANSPORTERS                   | 8.16E-06 | 0.000151248 |
| GHO_ATF5_TARGETS_UP                                                      | 8.34E-06 | 0.000154275 |
| CELLULAR_RESPONSE_TO_STRESS                                              | 9.79E-06 | 0.000180492 |
| ACETYL GALACTOSAMINYLTRANSFERASE_ACTIVITY                                | 1.00E-05 | 0.000184534 |
| NIKOLSKY_BREAST_CANCER_10Q22_AMPLICON                                    | 1.10E-05 | 0.00020164  |
| BIOCARTA_SODD_PATHWAY                                                    | 1.13E-05 | 0.00020752  |
| MYLLYKANGAS_AMPLIFICATION_HOT_SPOT_12                                    | 1.16E-05 | 0.000211454 |
| KEGG_FOLATE_BIOSYNTHESIS                                                 | 1.24E-05 | 0.000224791 |
| ONDER_CDH1_TARGETS_3_UP                                                  | 1.27E-05 | 0.000229771 |
| chr13q21                                                                 | 1.28E-05 | 0.000232331 |
| module_450                                                               | 1.31E-05 | 0.000236493 |
| REGULATION_OF_MYELOID_CELL_DIFFERENTIATION                               | 1.43E-05 | 0.000257549 |
| chr4q22                                                                  | 1.47E-05 | 0.00026357  |
| CDC42_PROTEIN_SIGNAL_TRANSDUCTION                                        | 1.50E-05 | 0.000268408 |
| NEGATIVE_REGULATION_OF_IMMUNE_SYSTEM_PROCESS                             | 1.51E-05 | 0.00026963  |
| PHOSPHORUS_OXYGEN_LYASE_ACTIVITY                                         | 1.53E-05 | 0.000272143 |
| MYLLYKANGAS_AMPLIFICATION_HOT_SPOT_7                                     | 1.59E-05 | 0.000281577 |

|                                                                            |             |             |
|----------------------------------------------------------------------------|-------------|-------------|
| module_563                                                                 | 1.69E-05    | 0.000299058 |
| CHANG_POU5F1_TARGETS_UP                                                    | 1.70E-05    | 0.000299976 |
| HONRADO_BREAST_CANCER_BRCA1_VS_BRCA2                                       | 1.71E-05    | 0.000301923 |
| module_264                                                                 | 1.97E-05    | 0.000345441 |
| SCHLESINGER_H3K27ME3_IN_NORMAL_AND_METHYLATED_IN_CANCER                    | 2.04E-05    | 0.000357266 |
| REACTOME_GRB2_SOS_PROVIDES_LINKAGE_TO_MAPK_SIGNALING_FOR_INTERGRINS_       | 2.15E-05    | 0.000376624 |
| LOPEZ_MESOTHELIOMA_SURVIVAL_OVERALL_UP                                     | 2.18E-05    | 0.000380971 |
| module_148                                                                 | 2.30E-05    | 0.000400118 |
| NIKOLSKY_BREAST_CANCER_1Q32_AMPLICON                                       | 2.31E-05    | 0.000400988 |
| FOCAL_ADHESION_FORMATION                                                   | 2.44E-05    | 0.000422233 |
| CYCLIC_NUCLEOTIDE_PHOSPHODIESTERASE_ACTIVITY                               | 2.62E-05    | 0.000451841 |
| MA_PITUITARY_FETAL_VS_ADULT_UP                                             | 2.62E-05    | 0.000451841 |
| OLIGOSACCHARYL_TRANSFERASE_COMPLEX                                         | 2.74E-05    | 0.000471026 |
| REGULATION_OF_T_CELL_PROLIFERATION                                         | 2.87E-05    | 0.000491522 |
| KERLEY_RESPONSE_TO_CISPLATIN_DN                                            | 2.90E-05    | 0.000495387 |
| DETECTION_OF_CHEMICAL_STIMULUS                                             | 2.99E-05    | 0.00050977  |
| SHIRAIISHI_PLZF_TARGETS_DN                                                 | 3.01E-05    | 0.000512273 |
| REACTOME_PKA_ACTIVATION                                                    | 3.22E-05    | 0.000545501 |
| HORMONE_BINDING                                                            | 3.40E-05    | 0.000575773 |
| module_0                                                                   | 3.47E-05    | 0.000584892 |
| REGULATION_OF_CHROMOSOME_ORGANIZATION_AND_BIOGENESIS                       | 3.61E-05    | 0.000607277 |
| module_135                                                                 | 3.70E-05    | 0.000621021 |
| DNA_DAMAGE_RESPONSESIGNAL_TRANSDUCTION_RESULTING_IN_INDUCTION_OF_APOPTOSIS | 3.86E-05    | 0.000647134 |
| PRODUCTION_OF_MOLECULAR_MEDIATOR_OF_IMMUNE_RESPONSE                        | 3.90E-05    | 0.000651299 |
| chr22q                                                                     | 3.93E-05    | 0.000655634 |
| MARSON_FOXP3_TARGETS_STIMULATED_UP                                         | 3.99E-05    | 0.000662796 |
| CYCLASE_ACTIVITY                                                           | 4.01E-05    | 0.000664561 |
| EHLERS_ANEUPLOIDY_DN                                                       | 4.05E-05    | 0.000669949 |
| XU_RESPONSE_TO_TRETINOIN_UP                                                | 4.19E-05    | 0.000691542 |
| HSC_MATURE_FETAL                                                           | 4.22E-05    | 0.000694802 |
| G2_M_TRANSITION_OF_MITOTIC_CELL_CYCLE                                      | 4.24E-05    | 0.000696812 |
| LEI_MYB_TARGETS                                                            | 4.34E-05    | 0.000711107 |
| CARBONATE_DEHYDRATASE_ACTIVITY                                             | 4.55E-05    | 0.000744567 |
| BACODOD_RESISTANCE_TO_ALKYLATING_AGENTS_UP                                 | 4.62E-05    | 0.000752699 |
| TOMLINS_METASTASIS_UP                                                      | 5.65E-05    | 0.000920018 |
| PHOTORECEPTOR_CELL_MAINTENANCE                                             | 5.73E-05    | 0.000930316 |
| CHIANG_LIVER_CANCER_SUBCLASS_UNANNOTATED_UP                                | 5.79E-05    | 0.000937238 |
| chrXq11                                                                    | 6.19E-05    | 0.000999614 |
| INTERLEUKIN_1_SECRETION                                                    | 6.25E-05    | 0.001006388 |
| YAO_TEMPORAL_RESPONSE_TO_PROGESTERONE_CLUSTER_4                            | 6.29E-05    | 0.00101125  |
| ANION_TRANSPORT                                                            | 7.01E-05    | 0.00112351  |
| DYSTROPHIN_ASSOCIATED_GLYCOPROTEIN_COMPLEX                                 | 7.30E-05    | 0.001168278 |
| AMINO_SUGAR_METABOLIC_PROCESS                                              | 7.47E-05    | 0.001192767 |
| YAO_HOXA10_TARGETS_VIA_PROGESTERONE_DN                                     | 7.49E-05    | 0.00119308  |
| module_478                                                                 | 8.65E-05    | 0.001374383 |
| NEUROPEPTIDE_BINDING                                                       | 8.82E-05    | 0.001394804 |
| NEUROPEPTIDE_RECEPTOR_ACTIVITY                                             | 8.82E-05    | 0.001394804 |
| LE_SKI_TARGETS_DN                                                          | 9.23E-05    | 0.001456892 |
| BIOCARTA_RANMS_PATHWAY                                                     | 9.73E-05    | 0.001531226 |
| GOERING_BLOOD_HDL_CHOLESTEROL_QTL_CIS                                      | 0.000100144 | 0.001568928 |
| GLYCOLIPID_METABOLIC_PROCESS                                               | 0.000100034 | 0.001568928 |
| GTCTACC,MIR-379                                                            | 0.000100964 | 0.001574831 |
| REACTOME_EFFECTS_OF_PIP2_HYDROLYSIS                                        | 0.000100987 | 0.001574831 |
| PROTEIN_STABILIZATION                                                      | 0.000102233 | 0.001590601 |
| POSITIVE_REGULATION_OF_CYTOKINE_BIOSYNTHETIC_PROCESS                       | 0.000106027 | 0.001645852 |
| REACTOME_STEROID_HORMONE_BIOSYNTHESIS                                      | 0.000107255 | 0.001661098 |
| REACTOME_RAS_ACTIVATION_UOPN_CA2_INFUX_THROUGH_NMDA_RECEPTOR               | 0.000112629 | 0.001740351 |
| VERRECCHIA_RESPONSE_TO_TGFB1_C4                                            | 0.000113967 | 0.001753016 |
| BIOCARTA_CARDIACEGF_PATHWAY                                                | 0.000113792 | 0.001753016 |
| REACTOME_NF_KB_IS_ACTIVATED_AND_SIGNALS_SURVIVAL                           | 0.000117828 | 0.001808305 |
| WANG_RESPONSE_TO_FORSKOLIN_DN                                              | 0.000118297 | 0.00181139  |
| FERRARI_RESPONSE_TO_FENRETINIDE_DN                                         | 0.000119716 | 0.001828981 |
| DNA_REPLICATION_INITIATION                                                 | 0.000123841 | 0.001887743 |
| LU_TUMOR_VASCULATURE_DN                                                    | 0.000125618 | 0.001910522 |
| MICROVILLUS                                                                | 0.000132138 | 0.002005179 |
| LY_AGING_OLD_UP                                                            | 0.000134657 | 0.002038826 |
| REACTOME_PHOSPHOLIPASE_CMEDIATED_CASCADE                                   | 0.00013528  | 0.002039142 |
| chr11p                                                                     | 0.000135081 | 0.002039142 |
| EHLERS_ANEUPLOIDY_UP                                                       | 0.000141464 | 0.002127619 |
| AGCGCAG,MIR-191                                                            | 0.000141997 | 0.002130898 |
| BIOCARTA_41BB_PATHWAY                                                      | 0.000143264 | 0.002145151 |
| BIOCARTA_ARAP_PATHWAY                                                      | 0.000150832 | 0.002253496 |
| HU_ANGIOGENESIS_UP                                                         | 0.000152375 | 0.002271533 |
| KYNG_ENVIRONMENTAL_STRESS_RESPONSE_NOT_BY_GAMMA_IN_OLD                     | 0.000157403 | 0.002341333 |
| HEME_BIOSYNTHETIC_PROCESS                                                  | 0.000179822 | 0.002668932 |
| chr2q                                                                      | 0.000189346 | 0.002804141 |
| MONTERO_THYROID_CANCER_POOR_SURVIVAL_DN                                    | 0.000191039 | 0.002823037 |

|                                                                 |             |             |
|-----------------------------------------------------------------|-------------|-------------|
| REACTOME_RNA_POLYMERASE_III_CHAIN_ELONGATION                    | 0.000195736 | 0.002886153 |
| chr18q22                                                        | 0.000203754 | 0.002997848 |
| GUTIERREZ_CHRONIC_LYMPHOCYTIC_LEUKEMIA_UP                       | 0.000206547 | 0.003027857 |
| BODY_FLUID_SECRETION                                            | 0.000206689 | 0.003027857 |
| BIOGENIC_AMINE_METABOLIC_PROCESS                                | 0.000211066 | 0.003085306 |
| ZIRN_TRETINOIN_RESPONSE_WT1_DN                                  | 0.000224585 | 0.003275839 |
| module_71                                                       | 0.000227446 | 0.003310434 |
| ADP_BINDING                                                     | 0.000232461 | 0.003376173 |
| MOTOR_ACTIVITY                                                  | 0.000240858 | 0.003485514 |
| chr9p11                                                         | 0.000241102 | 0.003485514 |
| LYSOSOMAL_MEMBRANE                                              | 0.000248659 | 0.003588325 |
| CAFFAREL_RESPONSE_TO_THC_8HR_5_UP                               | 0.000250338 | 0.003604869 |
| AMUNDSON_GAMMA_RADIATION_RESISTANCE                             | 0.000252222 | 0.003624252 |
| VACUOLAR_MEMBRANE                                               | 0.000256192 | 0.003673536 |
| SIALYLTRANSFERASE_ACTIVITY                                      | 0.000269826 | 0.003860854 |
| REACTOME_GLUCAGON_TYPE_LIGAND_RECEPTORS                         | 0.000278951 | 0.003982997 |
| NLS_BEARING_SUBSTRATE_IMPORT_INTO_NUCLEUS                       | 0.000300945 | 0.004287997 |
| KEGG_GLYOXYLATE_AND_DICARBOXYLATE_METABOLISM                    | 0.000308826 | 0.004391042 |
| COLLIS_PRKDC_SUBSTRATES                                         | 0.000313205 | 0.004443966 |
| CLAUS_PGR_POSITIVE_MENINGIOMA_UP                                | 0.000315433 | 0.004466219 |
| SCIAN_CELL_CYCLE_TARGETS_OF_TP53_AND_TP73_UP                    | 0.00031684  | 0.00447677  |
| module_186                                                      | 0.000317689 | 0.004479417 |
| MYLLYKANGAS_AMPLIFICATION_HOT_SPOT_25                           | 0.000347108 | 0.004884051 |
| DORN_ADENOVIRUS_INFECTION_32HR_UP                               | 0.000350386 | 0.004919948 |
| PHOSPHOLIPASE_A2_ACTIVITY                                       | 0.000369577 | 0.005178674 |
| REGULATION_OF_SYNAPSE_STRUCTURE_AND_ACTIVITY                    | 0.00037471  | 0.005239742 |
| WEBER_METHYLATED_HCP_IN_FIBROBLAST_DN                           | 0.000379607 | 0.00529728  |
| V\$MEF2_04                                                      | 0.000391005 | 0.005433924 |
| module_173                                                      | 0.000390691 | 0.005433924 |
| REACTOME_G_ALPHA_Z_SIGNALLING_EVENTS                            | 0.00041223  | 0.005717153 |
| module_534                                                      | 0.000420029 | 0.005813412 |
| module_21                                                       | 0.00042375  | 0.005852938 |
| GOUYER_TUMOR_INVASIVENESS                                       | 0.000433714 | 0.005978358 |
| NEGATIVE_REGULATION_OF_CYTOSKELETON_ORGANIZATION_AND_BIOGENESIS | 0.000436479 | 0.006004254 |
| DORN_ADENOVIRUS_INFECTION_48HR_UP                               | 0.000449921 | 0.0061766   |
| CYTOSOLIC_PART                                                  | 0.000456652 | 0.006256313 |
| BERENJENO_TRANSFORMED_BY_RHOA_REVERSIBLY_UP                     | 0.000465321 | 0.006362209 |
| REACTOME_CYTOCHROME_P450_ARRANGED_BY_SUBSTRATE_TYPE             | 0.000472991 | 0.006454032 |
| LIU_BREAST_CANCER                                               | 0.000477257 | 0.006499147 |
| chr5q15                                                         | 0.000479546 | 0.006517208 |
| BUKANOVICH_T_LYMPHOCYTE_HOMING_ON_TUMOR_UP                      | 0.00048401  | 0.006564684 |
| CORNIFIED_ENVELOPE                                              | 0.000505407 | 0.006841193 |
| MOROSETTI_FACIOSCAPULOHUMERAL_MUSCULAR_DISTROPHY_DN             | 0.000506616 | 0.006843868 |
| LIPID_HOMEOSTASIS                                               | 0.000522278 | 0.007041392 |
| BRUSH_BORDER                                                    | 0.0005302   | 0.007133984 |
| chr8q11                                                         | 0.000561465 | 0.007539677 |
| KEGG_SULFUR_METABOLISM                                          | 0.000564545 | 0.007566024 |
| ABDULRAHMAN_KIDNEY_CANCER_VHL_DN                                | 0.000571595 | 0.007645371 |
| REGULATION_OF_RAS_GTPASE_ACTIVITY                               | 0.000576337 | 0.007693582 |
| REACTOME_HORMONE_BIOSYNTHESIS                                   | 0.000597682 | 0.007962815 |
| chr9p21                                                         | 0.000636713 | 0.008466157 |
| STEGMEIER_PRE-MITOTIC_CELL_CYCLE_REGULATORS                     | 0.000658911 | 0.008744138 |
| RNA_ELONGATION                                                  | 0.000662771 | 0.008778143 |
| GNF2_CD14                                                       | 0.000668714 | 0.008839569 |
| APICAL_PLASMA_MEMBRANE                                          | 0.000671816 | 0.008863257 |
| BIOCARTA_THELPER_PATHWAY                                        | 0.000713077 | 0.009389316 |
| REACTOME_STEROID_HORMONES                                       | 0.00072101  | 0.009475331 |
| ZHANG_RESPONSE_TO_CANTHARIDIN_UP                                | 0.000723193 | 0.009485598 |
| AGTGCGT,MIR-521                                                 | 0.000731562 | 0.009576808 |

**Supplementary Table 5: 72 pathways commonly changed in ChIP-seq and gene expression microarray**

| pathway                                                                   | p-value     | q-value     |
|---------------------------------------------------------------------------|-------------|-------------|
| LINDGREN_BLADDER_CANCER_CLUSTER_2A_UP                                     | <1.00E-16   | <1.00E-16   |
| GAUSSMANN_MLL_AF4_FUSION_TARGETS_B_DN                                     | <1.00E-16   | <1.00E-16   |
| TURJANSKI_MAPK8_AND_MAPK9_TARGETS                                         | <1.00E-16   | <1.00E-16   |
| TURJANSKI_MAPK7_TARGETS                                                   | <1.00E-16   | <1.00E-16   |
| STARK_BRAIN_22Q11_DELETION                                                | <1.00E-16   | <1.00E-16   |
| OSAWA_TNF_TARGETS                                                         | <1.00E-16   | <1.00E-16   |
| KYNG_ENVIRONMENTAL_STRESS_RESPONSE_NOT_BY_UV_IN_WS                        | <1.00E-16   | <1.00E-16   |
| GALI_TP53_TARGETS_APOPTOTIC_DN                                            | <1.00E-16   | <1.00E-16   |
| BOQUEST_STEM_CELL_DN                                                      | <1.00E-16   | <1.00E-16   |
| KRISHNAN_FURIN_TARGETS_UP                                                 | <1.00E-16   | <1.00E-16   |
| MONOCARBOXYLIC_ACID_TRANSPORT                                             | <1.00E-16   | <1.00E-16   |
| module_390                                                                | <1.00E-16   | <1.00E-16   |
| BIOCARTA_FEEDER_PATHWAY                                                   | <1.00E-16   | <1.00E-16   |
| chr3p13                                                                   | <1.00E-16   | <1.00E-16   |
| chr1p                                                                     | <1.00E-16   | <1.00E-16   |
| chr4q11                                                                   | <1.00E-16   | <1.00E-16   |
| TSAI_DNAJB4_TARGETS_DN                                                    | 1.11E-16    | 5.64E-15    |
| THUM_MIR21_TARGETS_HEART_DISEASE_DN                                       | 5.66E-15    | 2.60E-13    |
| XU_RESPONSE_TO_TRETINOIN_DN                                               | 5.01E-14    | 2.19E-12    |
| PEPPER_CHRONIC_LYMPHOCYTIC_LEUKEMIA_DN                                    | 7.09E-14    | 3.06E-12    |
| PEPTIDE_METABOLIC_PROCESS                                                 | 7.79E-14    | 3.28E-12    |
| module_283                                                                | 2.01E-13    | 8.10E-12    |
| NEGATIVE_REGULATION_OF_MYELOID_CELL_DIFFERENTIATION                       | 5.85E-13    | 2.23E-11    |
| ST_INTERLEUKIN_13_PATHWAY                                                 | 6.93E-13    | 2.57E-11    |
| ST_IL_13_PATHWAY                                                          | 6.93E-13    | 2.57E-11    |
| MANN_RESPONSE_TO_AMIFOSTINE_DN                                            | 5.10E-12    | 1.69E-10    |
| INTERLEUKIN_8_PRODUCTION                                                  | 1.01E-11    | 3.30E-10    |
| chr2p                                                                     | 1.38E-11    | 4.42E-10    |
| module_140                                                                | 2.64E-10    | 7.94E-09    |
| REACTOME_BILE_SALT_AND_ORGANIC_ANION_SLC_TRANSPORTERS                     | 6.84E-10    | 1.97E-08    |
| PENG_Glutamine_Deprivation_Up                                             | 2.26E-09    | 6.05E-08    |
| MYLLYKANGAS_AMPLIFICATION_HOT_SPOT_9                                      | 2.96E-09    | 7.87E-08    |
| SCHURINGA_STAT5A_TARGETS_UP                                               | 5.59E-09    | 1.45E-07    |
| WHITESIDE_CISPLATIN_RESISTANCE_DN                                         | 6.55E-09    | 1.69E-07    |
| SIMBULAN_UV_RESPONSE_NORMAL_UP                                            | 1.17E-08    | 2.95E-07    |
| RAY_TARGETS_OF_P210_BCR_ABL_FUSION_UP                                     | 1.63E-08    | 4.06E-07    |
| IIZUKA_LIVER_CANCER_PROGRESSION_G1_G2_UP                                  | 3.48E-08    | 8.28E-07    |
| LYSOSOMAL_TRANSPORT                                                       | 3.49E-08    | 8.28E-07    |
| BYSTRYKH_HEMATOPOIESIS_STEM_CELL_FL1                                      | 7.08E-08    | 1.64E-06    |
| KORKOLA_YOLK_SAC_TUMOR_DN                                                 | 7.45E-08    | 1.72E-06    |
| GENE_SILENCING                                                            | 9.60E-08    | 2.18E-06    |
| VITAMIN_BINDING                                                           | 1.86E-07    | 4.06E-06    |
| GOUYER_TATI_TARGETS_UP                                                    | 1.35E-06    | 2.56E-05    |
| BOYALT_LIVER_CANCER_SUBCLASS_G23_DN                                       | 1.59E-06    | 2.99E-05    |
| chr13q33                                                                  | 2.09E-06    | 3.87E-05    |
| BIOCARTA_FIBRINOLYSIS_PATHWAY                                             | 1.00E-05    | 0.000165543 |
| WONG_IFNA2_RESISTANCE_DN                                                  | 1.82E-05    | 0.000281381 |
| REACTOME_FACILITATIVE_NA_INDEPENDENT_GLUCOSE_TRANSPORTERS                 | 2.38E-05    | 0.000359465 |
| IVANOV_MUTATED_IN_COLOM_CANCER                                            | 2.49E-05    | 0.000374019 |
| MARTINELLI_IMMATURE_NEUTROPHIL_DN                                         | 2.89E-05    | 0.000428147 |
| SYNAPTOGENESIS                                                            | 5.30E-05    | 0.000741522 |
| PROTEIN_SERINE_THREONINE_TYROSINE_KINASE_ACTIVITY                         | 5.45E-05    | 0.000761356 |
| chr19p                                                                    | 5.60E-05    | 0.000780348 |
| LIU_CMYB_TARGETS_DN                                                       | 7.28E-05    | 0.000990347 |
| PYEON_HPV_POSITIVE_TUMORS_DN                                              | 0.000112996 | 0.001436164 |
| CGGTGTG.MIR-220                                                           | 0.000113378 | 0.001437777 |
| CGTCTTA.MIR-208                                                           | 0.000114007 | 0.001442513 |
| TURJANSKI_MAPK1_AND_MAPK2_TARGETS                                         | 0.000123828 | 0.001552841 |
| REACTOME_GLUCURONIDATION                                                  | 0.000183713 | 0.002243987 |
| module_423                                                                | 0.000197567 | 0.002397641 |
| module_470                                                                | 0.000219183 | 0.002631669 |
| MARSON_FOXP3_TARGETS_STIMULATED_DN                                        | 0.000228259 | 0.002734823 |
| POSITIVE_REGULATION_OF_ANGIOGENESIS                                       | 0.000235215 | 0.002812193 |
| NEGATIVE_REGULATION_OF_ANGIOGENESIS                                       | 0.000248998 | 0.002927367 |
| MYLLYKANGAS_AMPLIFICATION_HOT_SPOT_22                                     | 0.000300619 | 0.003490613 |
| REGULATION_OF_ENDOTHELIAL_CELL_PROLIFERATION                              | 0.000404714 | 0.004576887 |
| REACTOME_A_THIRD_PROTEOLYTIC_CLEAVAGE_RELEASES_NICD                       | 0.000445673 | 0.004970361 |
| REACTOME_BASE_FREE_SUGAR_PHOSPHATE_REMOVAL_VIA_THE_SINGLE_NUCLEOTIDE_REPL | 0.000517699 | 0.005705973 |
| BIOCARTA_ASBCCELL_PATHWAY                                                 | 0.00066021  | 0.007083021 |
| chr11p12                                                                  | 0.000718845 | 0.007639469 |
| chr5p14                                                                   | 0.00081571  | 0.008572032 |



**Supplementary Table 6: No race-associated difference in pathways (ChIP-seq)**

| pathway                                                     | p-value     | q-value     |
|-------------------------------------------------------------|-------------|-------------|
| NIKOLSKY_BREAST_CANCER_17Q11_Q21_AMPLICON                   | 0.000158289 | 0.375524621 |
| RESPONSE_TO_TOXIN                                           | 0.000174617 | 0.375524621 |
| NAM_FXYD5_TARGETS_DN                                        | 0.000209996 | 0.375524621 |
| MORF_DDB1                                                   | 0.000380695 | 0.472290788 |
| SULFURIC_ESTER_HYDROLASE_ACTIVITY                           | 0.000595949 | 0.472290788 |
| RASHI_RESPONSE_TO_IONIZING_RADIATION_3                      | 0.000621829 | 0.472290788 |
| MACROMOLECULAR_COMPLEX_DISASSEMBLY                          | 0.000831024 | 0.472290788 |
| KEGG_PURINE_METABOLISM                                      | 0.001275578 | 0.472290788 |
| MORF_PPP5C                                                  | 0.001339673 | 0.472290788 |
| KEGG_NUCLEOTIDE_EXCISION_REPAIR                             | 0.001481486 | 0.472290788 |
| GINESTIER_BREAST_CANCER_20Q13_AMPLIFICATION_DN              | 0.001559754 | 0.472290788 |
| PROTEIN_COMPLEX_DISASSEMBLY                                 | 0.001752054 | 0.472290788 |
| CELLULAR_PROTEIN_COMPLEX_DISASSEMBLY                        | 0.001771966 | 0.472290788 |
| chr11q12                                                    | 0.001954902 | 0.472290788 |
| REACTOME_NUCLEOTIDE_EXCISION_REPAIR                         | 0.001993975 | 0.472290788 |
| ST_INTERLEUKIN_13_PATHWAY                                   | 0.001995981 | 0.472290788 |
| ST_IL_13_PATHWAY                                            | 0.001995981 | 0.472290788 |
| V\$USF2_Q6                                                  | 0.002042061 | 0.472290788 |
| MORF_PRKAG1                                                 | 0.002136326 | 0.472290788 |
| PHOSPHOLIPASE_A2_ACTIVITY                                   | 0.002215713 | 0.472290788 |
| MORF_HEAB                                                   | 0.002385815 | 0.472290788 |
| GCM_VAV1                                                    | 0.002405021 | 0.472290788 |
| LASTOWSKA_NEUROBLASTOMA_COPY_NUMBER_DN                      | 0.002412944 | 0.472290788 |
| REACTOME_GLOBAL_GENOMIC_NER                                 | 0.00244041  | 0.472290788 |
| BIOCARTA_EIF_PATHWAY                                        | 0.002448087 | 0.472290788 |
| CARBOXYLESTERASE_ACTIVITY                                   | 0.002540846 | 0.472290788 |
| REACTOME_POST_NMDA_RECEPTOR_ACTIVATION_EVENTS               | 0.002610959 | 0.472290788 |
| REACTOME_GRB2_SOS_PROVIDES_LINKAGE_TO_MAPK_SIGNALING_FOR_IN | 0.002638743 | 0.472290788 |
| REACTOME_PI3K_AKT_SIGNALLING                                | 0.002739341 | 0.472290788 |
| VERRECCHIA_RESPONSE_TO_TGFB1_C3                             | 0.002751703 | 0.472290788 |
| GNF2_MLF1                                                   | 0.002920097 | 0.472290788 |
| WEIGEL_OXIDATIVE_STRESS_RESPONSE                            | 0.003002357 | 0.472290788 |
| NIKOLSKY_BREAST_CANCER_16Q24_AMPLICON                       | 0.00303828  | 0.472290788 |
| CHOI_ATL_CHRONIC_VS_ACUTE_DN                                | 0.003075832 | 0.472290788 |
| RESPONSE_TO_UV                                              | 0.003150465 | 0.472290788 |
| module_72                                                   | 0.003169306 | 0.472290788 |
| module_120                                                  | 0.003266468 | 0.473613954 |
| REACTOME_RNA_POLYMERASE_III_TRANSCRIPTION_INITIATION        | 0.003439953 | 0.47722301  |
| NIKOLSKY_BREAST_CANCER_6P24_P22_AMPLICON                    | 0.003669912 | 0.47722301  |
| chr22q13                                                    | 0.003776371 | 0.47722301  |
| chr6q14                                                     | 0.003927351 | 0.47722301  |
| MORF_IKBKG                                                  | 0.003941263 | 0.47722301  |
| MICROTUBULE_ASSOCIATED_COMPLEX                              | 0.004023771 | 0.47722301  |
| TRANSCRIPTION_FACTOR_COMPLEX                                | 0.004056758 | 0.47722301  |
| HISTONE_DEACETYLASE_COMPLEX                                 | 0.004064347 | 0.47722301  |
| GNF2_CCNA1                                                  | 0.004451406 | 0.47722301  |
| PRODUCTION_OF_MOLECULAR_MEDIATOR_OF_IMMUNE_RESPONSE         | 0.004666881 | 0.47722301  |
| RESPONSE_TO_LIGHT_STIMULUS                                  | 0.00474438  | 0.47722301  |
| WATANABE_RECTAL_CANCER_RADIO_THERAPY_RESPONSIVE_DN          | 0.005070008 | 0.47722301  |
| XENOBIOTIC_METABOLIC_PROCESS                                | 0.005080839 | 0.47722301  |
| V\$AP2_Q3                                                   | 0.005120358 | 0.47722301  |
| MORF_BMI1                                                   | 0.005127757 | 0.47722301  |
| WANG_CLIM2_TARGETS_UP                                       | 0.005204985 | 0.47722301  |
| GATTGGY_V\$NFY_Q6_01                                        | 0.005230706 | 0.47722301  |
| RODRIGUES_THYROID_CARCINOMA_UP                              | 0.005262964 | 0.47722301  |
| MORF_TERF1                                                  | 0.005411688 | 0.47722301  |
| REACTOME_TRANSCRIPTION_COUPLED_NER                          | 0.005555197 | 0.47722301  |
| chr2q14                                                     | 0.005563771 | 0.47722301  |
| V\$MAX_01                                                   | 0.005628594 | 0.47722301  |
| chr16p11                                                    | 0.005644857 | 0.47722301  |
| CHIN_BREAST_CANCER_COPY_NUMBER_DN                           | 0.005705828 | 0.47722301  |
| REACTOME_REGULATION_OF_INSULIN_SECRETION_BY_ACETYLCHOLINE   | 0.005715528 | 0.47722301  |
| CALCIUM_ION_TRANSMEMBRANE_TRANSPORTER_ACTIVITY              | 0.005791776 | 0.47722301  |
| TRANSCRIPTION_ELONGATION_REGULATOR_ACTIVITY                 | 0.005835394 | 0.47722301  |
| OSMAN_BLADDER_CANCER_DN                                     | 0.005842536 | 0.47722301  |
| BIOCARTA_CXCR4_PATHWAY                                      | 0.005906083 | 0.47722301  |
| WEBER_METHYLATED_HCP_IN_SPERM_UP                            | 0.006206823 | 0.47722301  |
| chr8p11                                                     | 0.006216954 | 0.47722301  |
| module_13                                                   | 0.006267465 | 0.47722301  |
| NIKOLSKY_BREAST_CANCER_5P15_AMPLICON                        | 0.006279201 | 0.47722301  |
| CTTTGTA.MIR-524                                             | 0.006661768 | 0.47722301  |
| V\$MYB_Q6                                                   | 0.00672545  | 0.47722301  |
| GGGCGGR_V\$SP1_Q6                                           | 0.006808503 | 0.47722301  |

|                                                                |             |             |
|----------------------------------------------------------------|-------------|-------------|
| chr12q24                                                       | 0.006810494 | 0.47722301  |
| chr9q32                                                        | 0.006925638 | 0.47722301  |
| REACTOME_RNA_POLYMERASE_III_TRANSCRIPTION_INITIATION_FROM_TYPE | 0.007084744 | 0.47722301  |
| chr11q25                                                       | 0.007139085 | 0.47722301  |
| DER_IFN_GAMMA_RESPONSE_DN                                      | 0.007414527 | 0.47722301  |
| chr1p34                                                        | 0.007480348 | 0.47722301  |
| chr2p12                                                        | 0.007518727 | 0.47722301  |
| ZHAN_MULTIPLE_MYELOMA_MS_DN                                    | 0.007768735 | 0.47722301  |
| REACTOME_RESOLUTION_OF_AP_SITES_VIA_THE_SINGLE_NUCLEOTIDE_RE   | 0.00778489  | 0.47722301  |
| BYSTRYKH_HEMATOPOIESIS_STEM_CELL_AND_BRAIN_QTL_TRANS           | 0.007820249 | 0.47722301  |
| module_162                                                     | 0.007878955 | 0.47722301  |
| ACTWSNACTNY_UNKNOWN                                            | 0.007899197 | 0.47722301  |
| NUCLEOTIDYLTRANSFERASE_ACTIVITY                                | 0.008024497 | 0.47722301  |
| GCM_DENR                                                       | 0.008071434 | 0.47722301  |
| CELL_MATRIX_JUNCTION                                           | 0.008086976 | 0.47722301  |
| GRESHOCK_CANCER_COPY_NUMBER_UP                                 | 0.008100555 | 0.47722301  |
| KAYO_AGING_MUSCLE_UP                                           | 0.008129232 | 0.47722301  |
| GRESHOCK_CANCER_COPY_NUMBER_DN                                 | 0.008466888 | 0.47722301  |
| MORF_ATRX                                                      | 0.008490764 | 0.47722301  |
| MOOTHA_PYR                                                     | 0.008524166 | 0.47722301  |
| MOOTHA_ROS                                                     | 0.008524166 | 0.47722301  |
| chr6p                                                          | 0.008694809 | 0.47722301  |
| WEBER_METHYLATED_IN_COLON_CANCER                               | 0.008704693 | 0.47722301  |
| REACTOME_P75NTR_RECRUITS_SIGNALLING_COMPLEXES                  | 0.008754985 | 0.47722301  |
| V\$NMYC_01                                                     | 0.008777011 | 0.47722301  |
| V\$SELF1_Q6                                                    | 0.008806609 | 0.47722301  |
| module_371                                                     | 0.00897697  | 0.481590223 |
| V\$STAT3_02                                                    | 0.009275291 | 0.489378808 |
| ST_WNT_CA2_CYCLIC_GMP_PATHWAY                                  | 0.009508702 | 0.489378808 |
| MORF_PHB                                                       | 0.009582163 | 0.489378808 |
| V\$ZID_01                                                      | 0.009724811 | 0.489378808 |
| BIOCARTA_RARRXR_PATHWAY                                        | 0.009813981 | 0.489378808 |

**Supplementary Table 7: No race-associated difference in pathways (gene expression microarray)**

| <b>pathway</b>                                      | <b>p-value</b> | <b>q-value</b> |
|-----------------------------------------------------|----------------|----------------|
| BRUNEAU_SEPTATION_ATRIAL                            | 0.029059209    | 0.996279098    |
| BIOCARTA_ACE2_PATHWAY                               | 0.032564961    | 0.996279098    |
| SMID_BREAST_CANCER_RELAPSE_IN_LIVER_UP              | 0.035072678    | 0.996279098    |
| SEIKE_LUNG_CANCER_POOR_SURVIVAL                     | 0.037160253    | 0.996279098    |
| module_441                                          | 0.048071605    | 0.996279098    |
| NEGATIVE_REGULATION_OF_MYELOID_CELL_DIFFERENTIATION | 0.055298397    | 0.996279098    |
| GNF2_MAPT                                           | 0.058385413    | 0.996279098    |
| BUDHU_LIVER_CANCER_METASTASIS_DN                    | 0.059640784    | 0.996279098    |
| BIOCARTA_PLATELETAPP_PATHWAY                        | 0.082633885    | 0.996279098    |

## **Supplementary Methods and Materials**

### **Subjects and clinical assessment**

Four subjects with schizophrenia and four age-, gender-, education-, and smoking habit-matched normal controls were recruited from our pool of patients and controls that we previously described (1). Patients were recruited from the outpatient psychiatric clinics of the Johns Hopkins Medical Institutions. The diagnosis was performed according to criteria of the Diagnostic and Statistical Manual of Mental Disorders-Fourth Edition (DSM-IV) (2). Normal controls were recruited from the general population through flyers posted at the Hopkins Hospital and an ad hoc advertisement placed in a local magazine. All subjects were administered the Structured Clinical Interview for DSM-IV Axis I Disorders-Clinician Version (SCID-IV) (3). All patients were assessed with the Scales for the Assessment of Positive and Negative Symptoms (SAPS and SANS) (4) by a study psychiatrist who specializes in schizophrenia (NC). Subjects were excluded from the study if they had a history of traumatic brain injury with loss of consciousness for >1 h, a history of drug abuse within 6 months of the study or drug dependence within 12 months of the study, or a history of untreated major medical illnesses. The study was approved by the Johns Hopkins Institutional Review Board, and all subjects gave written consent for their participation.

### **Nasal biopsy and olfactory cell culture**

Olfactory epithelium (OE) tissues were obtained by nasal biopsy as previously described (5). Dissociated olfactory cells were prepared as follows. First, OE tissue pieces were incubated with 2.4 U/mL Dispase II for 45 min at 37°C, and mechanically minced into small pieces. Then, the tissue pieces were further treated with 0.25 mg/mL collagenase A for 10 min at 37°C. Cells were gently suspended, and centrifuged to obtain pellets. Cell pellets were resuspended in D-MEM/F12 supplemented with 10% FBS and antibiotics (D-MEM/F12 medium), and tissue debris

was removed by transferring only the cell suspension into a new tube. Cells were then plated on 6-well plates in fresh D-MEM/F12 medium. Cells floating or loosely attached to the plate were collected on days 2 and 7, and further incubated on 6-well plates until they reached confluency. Finally, cells were collected by gentle trypsinization, and stored in liquid nitrogen tank until further use. After recovery, cells were maintained in D-MEM/F12 medium and supplemented with fresh medium every 2-3 days. For immunofluorescence cell staining, these olfactory cells are stained nearly homogeneously with  $\beta$ III-tubulin, a marker for immature neurons.

### **Chromatin immunoprecipitation (ChIP) and high-throughput sequencing**

Chromatin immunoprecipitation (ChIP) assay was carried out with ChIP-grade antibodies against H3K4me3 (#ab8580, Abcam) and H3K27me3 (#07-449, Millipore) (6) and Magna ChIP™ G Chromatin Immunoprecipitation Kit (Millipore) following the manufacturer's protocol. Five million olfactory cells were harvested from 80-90% confluent culture, and fixed with formaldehyde. After quenching and washing with PBS, the nuclear fraction was prepared and resuspended in Nuclear lysis buffer. Suspensions were then extensively sonicated with Sonic Dismembrator Model 100 (Fisher Scientific). After centrifugation, supernatant fractions were diluted with ChIP dilution buffer, and incubated with protein G magnetic beads and anti-H3K4me3 or anti-H3K27me3 antibodies overnight at 4°C. The samples were then washed with low-salt buffer, high-salt buffer, LiCl buffer, and TE buffer by using the magnetic separator. Finally, the samples were incubated at 62°C overnight to reverse the cross-links and the chromatin complex was recovered from beads. DNA was purified by QIAQuick PCR purification kit (Qiagen) and eluted in EB buffer. Aliquots of equal volumes from the samples after sonication were kept as input controls. Then, genomic DNA fragments prepared by ChIP were blunted, ligated with adapter DNA, and amplified using ChIP-Seq DNA sample preparation Kit (Illumina). DNA fragments of 150 – 300 bp size were collected for the sequencing reaction. Finally, DNA samples were loaded onto a flow cell by using the Cluster Generation kit GAll and

sequenced with 1G Genome analyzer (Illumina). Sequencing was performed with 8 individual samples loaded separately (4 normal controls and 4 patients with schizophrenia) on the same flow cell. We obtained 191-596 million 36-nucleotide reads per sample, among which about 50.9-78.7% of reads were mapped uniquely to locations in the reference human genome.

### **ChIP-seq data analysis**

ChIP-seq reads were aligned to the hg18 version of the human genome and then analyzed using CisGenome algorithms (<http://www.biostat.jhsph.edu/~hji/cisgenome/>) (7, 8). For individual gene analysis, all ChIP-seq data are expressed as quantile-normalized (by using the “affy” package within BioConductor in the R statistical language), log<sub>2</sub>-transformed, reads observed within ±1,000 base pairs of known RefSeq transcriptional start sites (TSSs). Although included in the analysis, data from subject 1 were not included in the reference distribution for the H3K4me3 data, as they caused artifacts in the resulting distributions. Differential ChIP-seq signals were determined by standard and moderated t-statistics (Significance Analysis of Microarrays, SAM in the “siggenes” R package) along with False Discovery Rate (FDR) analysis. For pathway analysis, we used the reads within ±2,000 base pairs of known RefSeq TSSs. We first cleaned the data by log<sub>2</sub> transformation of original counts and normalized them with quantile normalization and use of a C program. This gave us a continuous matrix with columns as subjects and rows as probes. Subsequently, we calculated the ratio of H3K4me3 signal levels to H3K27me3 signal levels ( $=[\text{H3K4me3 signals}]/[\text{H3K27me3 signals}]$ ) in each RefSeq gene promoter and performed the Wald test to screen out all pathways that were significantly associated with the disease.

### **Microarray experiments**

Total RNA was purified with RNeasy kit (Qiagen) from individual olfactory cells. The quality of RNA was 10 in RNA integrity number (RIN) score, which was assessed using a Bioanalyzer

RNA 6000 Nano Chip (Agilent Technologies). Microarray experiments were performed at the Johns Hopkins University Microarray Core Facility. Biotin-labeled cRNA was prepared by the Affymetrix 1-cycle amplification kit, and followed by hybridization and scanning. Fragmented biotin-labeled cRNA was hybridized on Affymetrix U133Plus2.0 chip at 45°C overnight. Post-hybridization was done according to the Affymetrix instructions. The chips were stained with R-Phycoerythrin streptavidin (Invitrogen) and scanned for signal detection with the Affymetrix scanner.

### **Microarray data analysis**

Data analysis was performed with custom code in the R statistical language and additional contributing packages within Bioconductor. Raw data were imported into a single AffyBatch object from CEL files. Additional data for probeset annotation was imported from metadata packages in the Bioconductor project. The position of probesets (3'-5' position within the mRNA) was used to assess RNA degradation in each sample after the GeneChip hybridization. RNA degradation plots were made using "AffyRNAdeg", "summaryAffyRNAdeg", and "plotAffyRNAdeg" functions in the "affy" package within Bioconductor. Both intensities in addition to ratios to the mean intensity for each array element were inspected using density plots, boxplots, and scatterplots. Intensities and ratios were visualized across the physical 2D surface of the arrays by generating GeneChip pseudo color images in order to investigate possible spatial artifacts. All raw intensities were normalized using quantile normalization-based algorithms in the "gcrma" package within Bioconductor. Following normalization, intensities and ratios were again inspected as described above. At all levels of analysis, dimension-reducing techniques including multidimensional scaling (MDS, with 1 minus Pearson's  $r$  as a distance metric), and principal components analysis (PCA) were used to identify outlier arrays and artifacts. After quality control, differential expression was determined by standard and moderated t-statistics (Significance Analysis of Microarrays, SAM in the "siggenes" R package)

along with False Discovery Rate (FDR) analysis. For pathway analysis, the microarray data set was presented in a matrix similar to that used in ChIP-seq analysis: columns as subjects and rows as the probes.

### Correlation analysis of ChIP-seq and microarray

ChIP-seq data were associated with expression data by cross-referencing RefSeq identifiers associated with Affymetrix probe sets with RefSeq identifiers associated with TSSs around which ChIP-seq data were tallied. This resulted in some ChIP-seq data being associated with more than one probe on the expression microarrays.

### Pathway analysis

Pathway analysis was performed with 6767 gene groups extracted from the Molecular Signature Database v3.0 (MSigDB) (<http://www.broadinstitute.org/gsea/msigdb/index.jsp>). We consider a gene group (pathway) consisting of  $G$  genes and suppose that there are  $n$  SZ patient and  $n$  control samples. For each schizophrenia sample  $i$  and gene  $g$ , we compute  $x_{ig} = \log_2(\text{normalized H3K4me3 ChIP-seq signal in TSS } \pm 2,000 \text{ bp}) - \log_2(\text{normalized H3K27me3 ChIP-seq signal in TSS } \pm 2,000 \text{ bp})$ . Similarly, for each control sample  $i$  and gene  $g$ , we also compute  $y_{ig} = \log_2(\text{normalized H3K4me3 ChIP-seq signal in TSS } \pm 2,000 \text{ bp}) - \log_2(\text{normalized H3K27me3 ChIP-seq signal in TSS } \pm 2,000 \text{ bp})$ . Let  $\mathbf{X}_i = (x_{i1}, \dots, x_{iG})'$  and  $\mathbf{Y}_i = (y_{i1}, \dots, y_{iG})'$ . The average histone modification signals for SZ and control group are

$$\bar{\mathbf{X}} = \frac{1}{n} \sum_{i=1}^n \mathbf{X}_i \quad \text{and} \quad \bar{\mathbf{Y}} = \frac{1}{n} \sum_{i=1}^n \mathbf{Y}_i$$

The average difference between SZ and control group is

$$\mathbf{D} = \bar{\mathbf{X}} - \bar{\mathbf{Y}} = (d_1, \dots, d_G)'$$

where



$$d_g = \frac{1}{n} \sum_{i=1}^n x_{ig} - \frac{1}{n} \sum_{i=1}^n y_{ig}$$

Here  $d_g$  is equivalent to measuring  $\Delta K4 - \Delta K27$  at gene  $g$ , where  $\Delta K4$  and  $\Delta K27$  are defined as the difference in the mean  $\log_2$  ChIP-seq signals between SZ patients and control for H3K4me3 and H3K27me3, respectively. Since H3K4me3 and H3K27me3 are indicators for gene activation and repression, respectively, a positive  $d_g$  should correlate with up-regulated gene expression in SZ, and a negative  $d_g$  should correlate with down-regulated gene expression in schizophrenia. We want to test whether  $\mathbf{D}$  is equal to zero, which would then imply that a pathway is not changed between SZ patients and controls. To do so, we used the generalized Wald test to assess the null hypothesis  $H_0: \mathbf{D} = \mathbf{0}$  versus the alternative hypothesis  $H_1: \mathbf{D} \neq \mathbf{0}$ . Let  $\mathbf{\Sigma}$  be the pooled sample covariance matrix of  $\mathbf{X}$  and  $\mathbf{Y}$ , and  $q = \text{rank}(\mathbf{\Sigma})$ . Let  $\mathbf{\Omega}$  be the pseudo-inverse of  $\mathbf{\Sigma}$ . The generalized Wald test computes the following test statistic:

$$T = n\mathbf{D}'\mathbf{\Omega}\mathbf{D}/2$$

Under the null hypothesis, the statistic above approximately follows a chi-square distribution  $\chi_q^2$  with  $q$  degrees of freedom. Therefore we use  $\chi_q^2$  to determine the p-value of the test. The same procedure was applied to all the gene groups (pathways), and the p-values were subsequently converted to q-values to adjust for multiple testing. The significance cut-off level was set at  $q=0.01$ , as the default choice by John Storey in their qvalue package (<http://www.bioconductor.org/packages/2.9/bioc/vignettes/qvalue/inst/doc/manual.pdf>).

### Quantitative RT-PCR

Total RNA was isolated using RNEasy Mini kit (Qiagen) with on-column or post hoc DNase I treatment, and first-strand cDNA was synthesized with use of oligo (dT)20 primer and SuperScript III Reverse Transcriptase (both from Invitrogen). Quantitative real-time PCR was carried out with SYBR GreenER reagent (Invitrogen) on ABI PRISM® 7900HT Sequence

Detection System (Applied Biosystems). PCR was performed by the following protocol: 50°C, 2 min; 95°C, 10 min; and 95°C, 15 sec, 60°C, 1 min for 40 cycles plus a dissociation curve step at the last step to verify single amplicon in the reaction. Data were normalized by the expression levels of ACTB mRNA. Statistical analysis was performed using standard two-tailed t-test.

The following gene-specific primers were used.  $\beta$ III-tubulin (TUBB3) and REG3G primers are the same as those used in a previous publication (5).

MGST1, 5'-ACGTGTACGCAGAGCCCACC-3', 5'-TGGCTGTAGAGGGGTCGGGA-3'.

DAAM2, 5'-GTTCTCCAGCCCCATCCCGAAC-3', 5'-CAGACTCTGCATCGCAGCCATGG-3'.

LPXN, 5'-GCAGATGCTGGCAAGAAGCA-3', 5'-CCCCCAAGCATTGAGTCCAG-3'.

$\beta$ III-tubulin, 5'-ACGTGTGAGCTGCTCCTGTCT-3', 5'-AAAACCGTAAAACGTCAGGCC-3'

REG3G, 5'-TCCCTCCACCATCTTAAACCC-3', 5'-CAGAAATCCTGTGCTTCTTGACA-3'

$\beta$ -actin, 5'-AGTCGGTTGGAGCGAGCATC-3', 5'-GGGGTGGCTTTTAGGATGGC-3'.

### **Immunocytochemistry**

Olfactory cells were seeded on coverslips and fixed with PBS containing 4% paraformaldehyde for 15 min at room temperature. After washing with PBS, the cells were washed with PBS containing 0.1% Triton-X100 for 15 min at room temperature. After 1 h blocking in PBS containing 5% goat serum at room temperature, the cells were incubated with rabbit polyclonal anti- $\beta$ III tubulin (Covance) overnight at 4°C. Then, after three washes with PBS, the cells were incubated for 2 h at room temperature with goat anti-rabbit IgG Alexa568 (Invitrogen). Nuclei were stained with DAPI (Invitrogen). Coverslips were mounted onto glass slides and visualized under an epifluorescence microscope (Zeiss).

## Additional references

1. Ishizuka K, Tajinda K, Colantuoni C, Morita M, Winicki J, Le C *et al.* Negative symptoms of schizophrenia correlate with impairment on the University of Pennsylvania smell identification test. *Neurosci Res* Jan; **66**(1): 106-110.
2. American Psychiatric Association APA, Task Force on DSM-IV. *Diagnostic and Statistical Manual of Mental Disorders: DSM-IV-TR*. 4th edn. American Psychiatric Association: Washington, DC, 2000.
3. First MB, Spitzer RL, Gibbon M, Williams JBW. *Structured Clinical Interview for DSM-IV Axis I Disorders-Clinical Version (SCID-CV)*. American Psychiatric Press: Washington, DC, 1997.
4. Andreasen NC, Olsen S. Negative v positive schizophrenia. Definition and validation. *Arch Gen Psychiatry* 1982 Jul; **39**(7): 789-794.
5. Tajinda K, Ishizuka K, Colantuoni C, Morita M, Winicki J, Le C *et al.* Neuronal biomarkers from patients with mental illnesses: a novel method through nasal biopsy combined with laser-captured microdissection. *Mol Psychiatry* Mar; **15**(3): 231-232.
6. Egelhofer TA, Minoda A, Klugman S, Lee K, Kolasinska-Zwierz P, Alekseyenko AA *et al.* An assessment of histone-modification antibody quality. *Nat Struct Mol Biol* Jan; **18**(1): 91-93.
7. Ji H, Jiang H, Ma W, Johnson DS, Myers RM, Wong WH. An integrated software system for analyzing ChIP-chip and ChIP-seq data. *Nat Biotechnol* 2008 Nov; **26**(11): 1293-1300.
8. Ji H. Computational analysis of ChIP-seq data. *Methods Mol Biol*; **674**: 143-159.
